# Supplementary material for: A synthetic strategy to xylose-containing thioglycoside tri- and tetrasaccharide building blocks corresponding to Cryptococcus neoformans capsular polysaccharide structures
Source: Royal Society of Chemistry journal article supplement (doi:10.1039/c5ob00766f), 2015-01-01

**A synthetic strategy to xylose-containing thioglycoside tri- and tetrasaccharide building blocks corresponding to *Cryptococcus neoformans* capsular polysaccharide structures.**

Lorenzo Guazzelli, Rebecca Ulc, Lina Rydner, and Stefan Oscarson<sup>1</sup>

*Centre for Synthesis and Chemical Biology, University College Dublin, Belfield, Dublin 4, Ireland*

**Supporting information**

**Table of contents**

<sup>1</sup>H and <sup>13</sup>C spectra of compound **3** page S2  
<sup>1</sup>H and <sup>13</sup>C spectra of compound **4** page S3  
<sup>1</sup>H and <sup>13</sup>C spectra of compound **5** page S4  
<sup>1</sup>H and <sup>13</sup>C spectra of compound **6** page S5  
<sup>1</sup>H and <sup>13</sup>C spectra of compound **7** page S6  
<sup>1</sup>H and <sup>13</sup>C spectra of compound **8** page S7  
<sup>1</sup>H and <sup>13</sup>C spectra of compound **9** page S8  
<sup>1</sup>H and <sup>13</sup>C spectra of compound **11** page S9  
<sup>1</sup>H and <sup>13</sup>C spectra of compound **12** page S10  
<sup>1</sup>H and <sup>13</sup>C spectra of compound **13** page S11  
<sup>1</sup>H and <sup>13</sup>C spectra of compound **15** page S12  
<sup>1</sup>H and <sup>13</sup>C spectra of compound **16** page S13  
<sup>1</sup>H and <sup>13</sup>C spectra of compound **17** page S14  
<sup>1</sup>H and <sup>13</sup>C spectra of compound **18** page S15  
<sup>1</sup>H and <sup>13</sup>C spectra of compound **20** page S16  
<sup>1</sup>H and <sup>13</sup>C spectra of compound **21** page S17  
<sup>1</sup>H, <sup>13</sup>C and HSQC spectra of compound **23** pages S18-S19  
<sup>1</sup>H, <sup>13</sup>C and HSQC spectra of compound **24** pages S19-S20  
<sup>1</sup>H and <sup>13</sup>C and HSQC spectra of compound **25** page S21-S22  
<sup>1</sup>H and <sup>13</sup>C and HSQC spectra of compound **26** page S22-S23  
<sup>1</sup>H and HSQC spectra of compound **27** page S24  
<sup>1</sup>H and HSQC spectra of compound **28** page S25

---

<sup>1</sup> Corresponding author. E-mail address: stefan.oscarson@ucd.ie

**3:**  $^1\text{H}$  NMR ( $\text{CDCl}_3$ , 500 MHz)

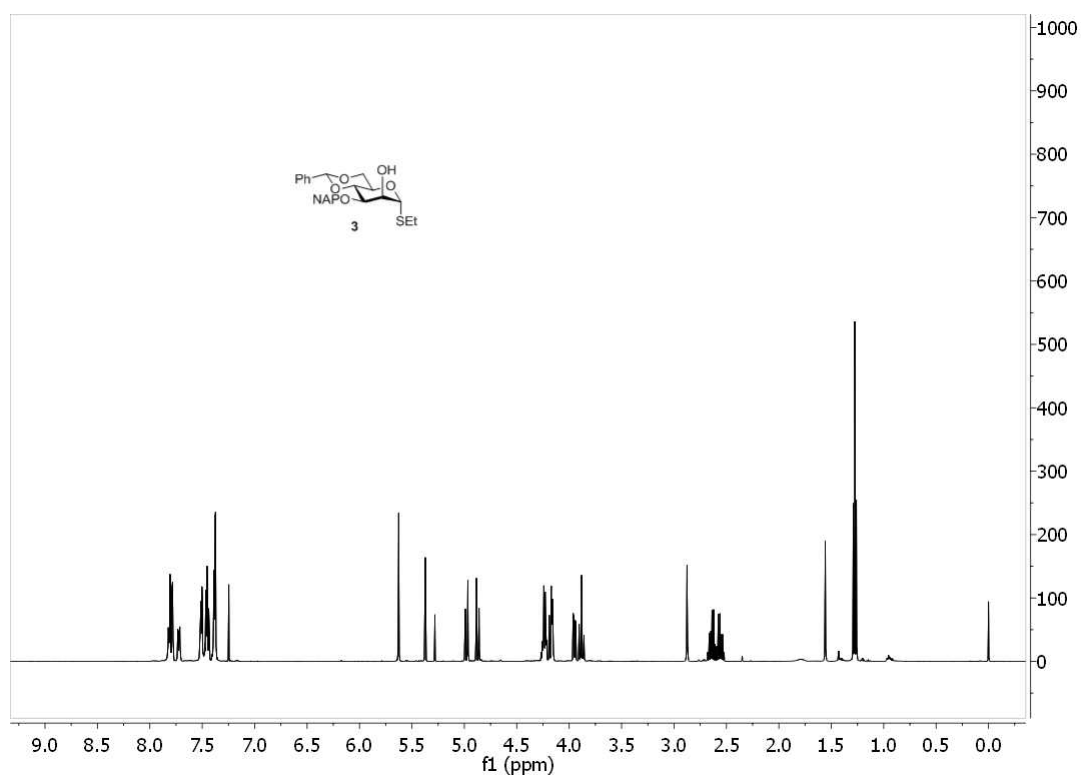

**3:**  $^{13}\text{C}$  NMR ( $\text{CDCl}_3$ , 125 MHz)

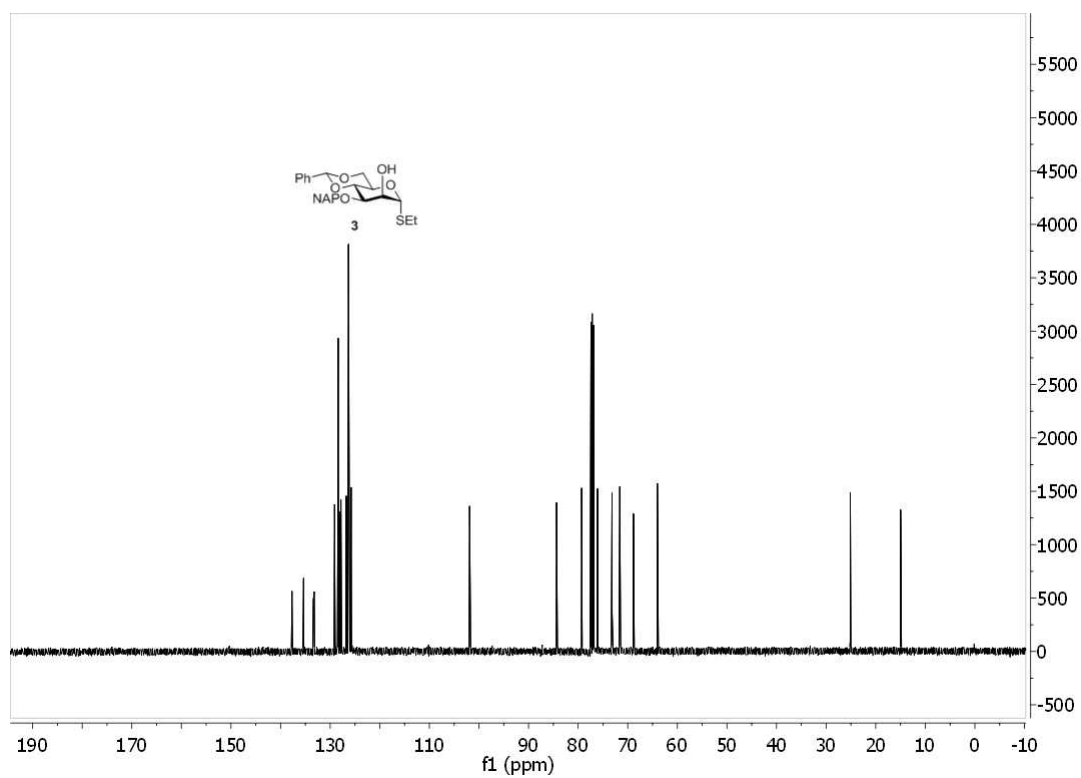

4:  $^1\text{H}$  NMR ( $\text{CDCl}_3$ , 500 MHz)

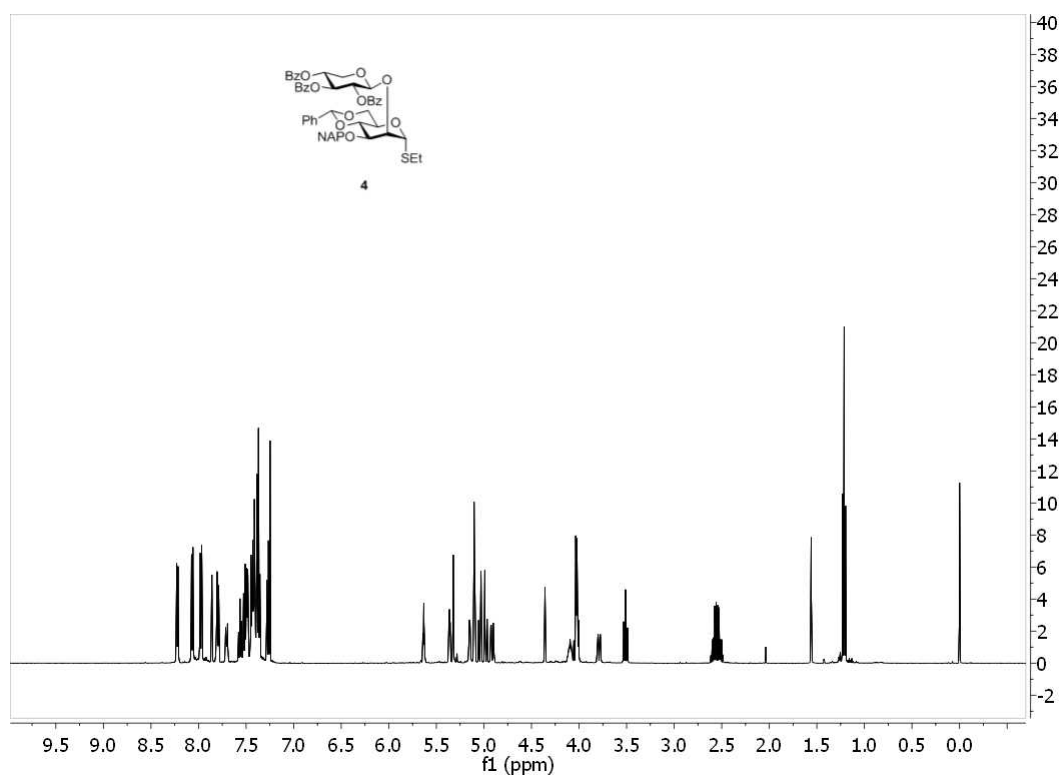

4:  $^{13}\text{C}$  NMR ( $\text{CDCl}_3$ , 125 MHz)

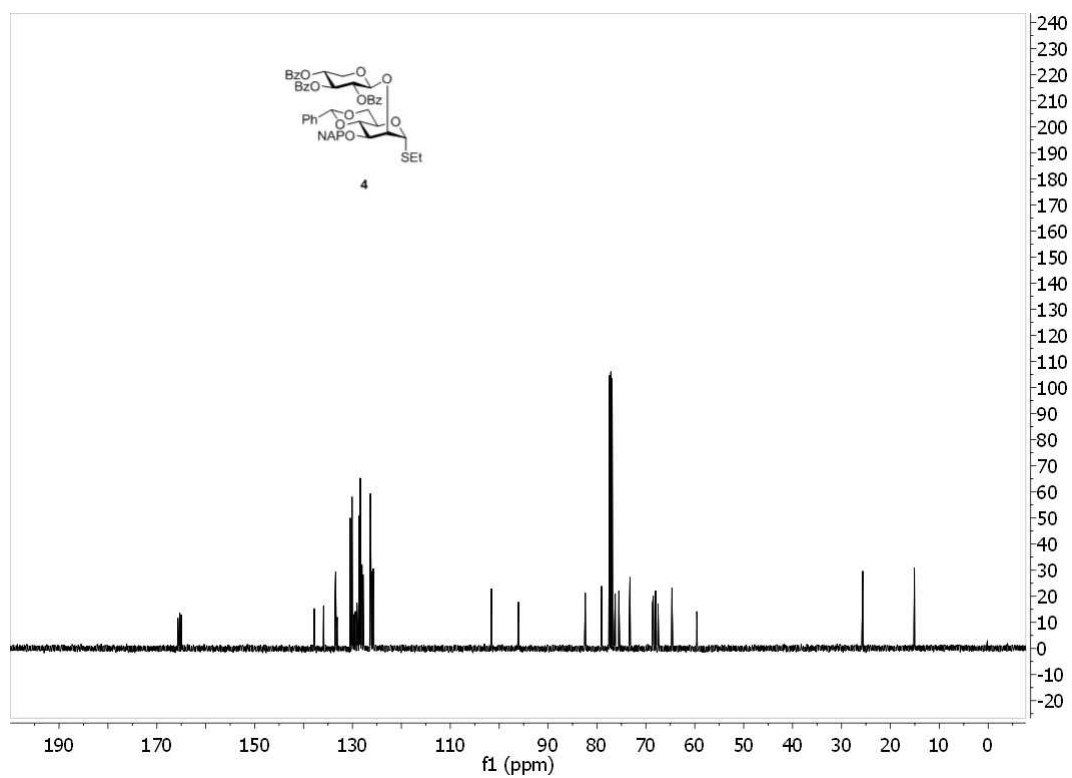

**5:**  $^1\text{H}$  NMR ( $\text{CDCl}_3$ , 500 MHz)

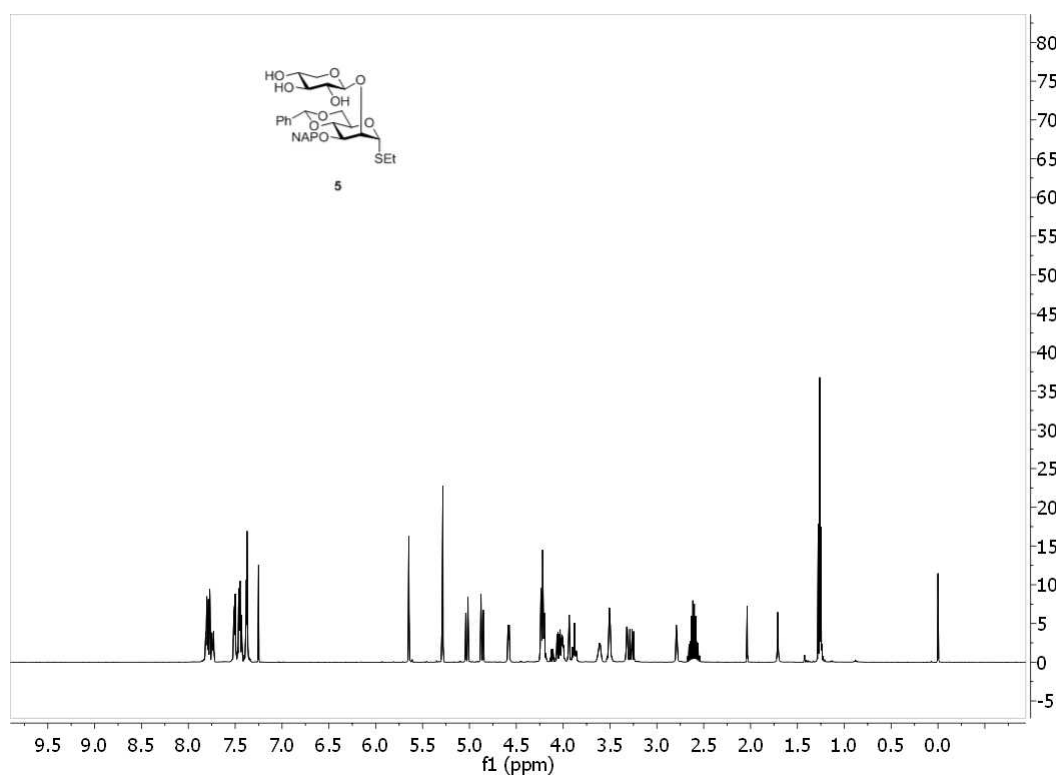

**5:**  $^{13}\text{C}$  NMR ( $\text{CDCl}_3$ , 125 MHz)

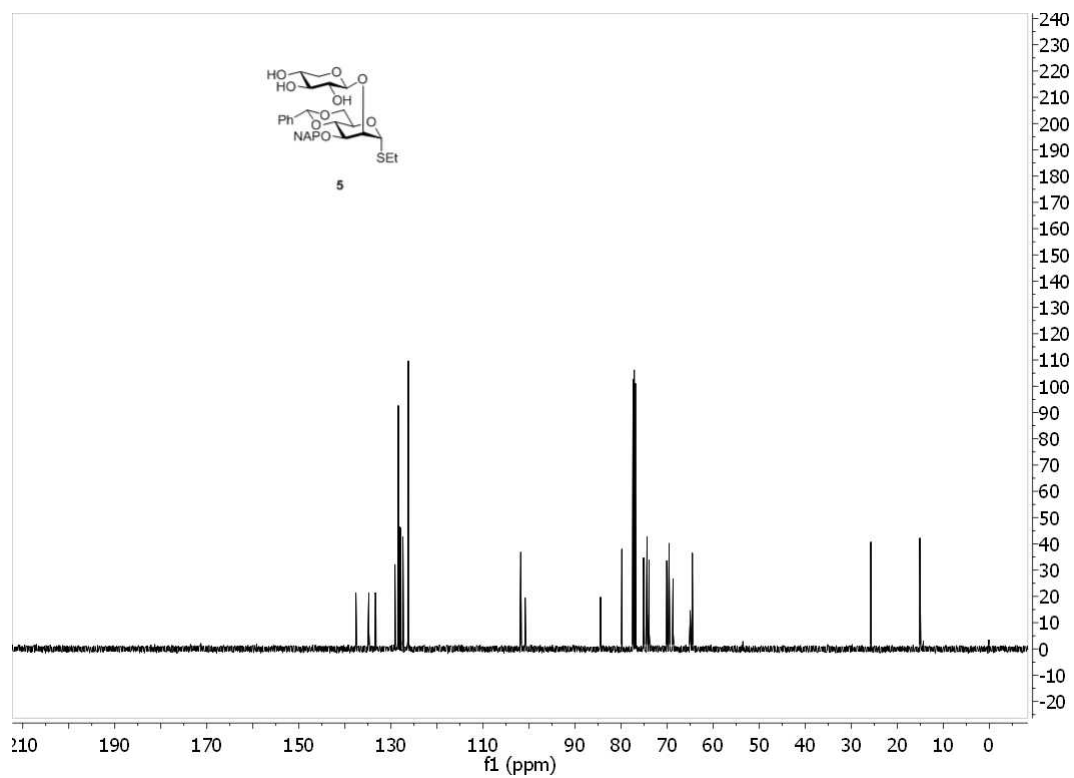

**6:**  $^1\text{H}$  NMR ( $\text{CDCl}_3$ , 500 MHz)

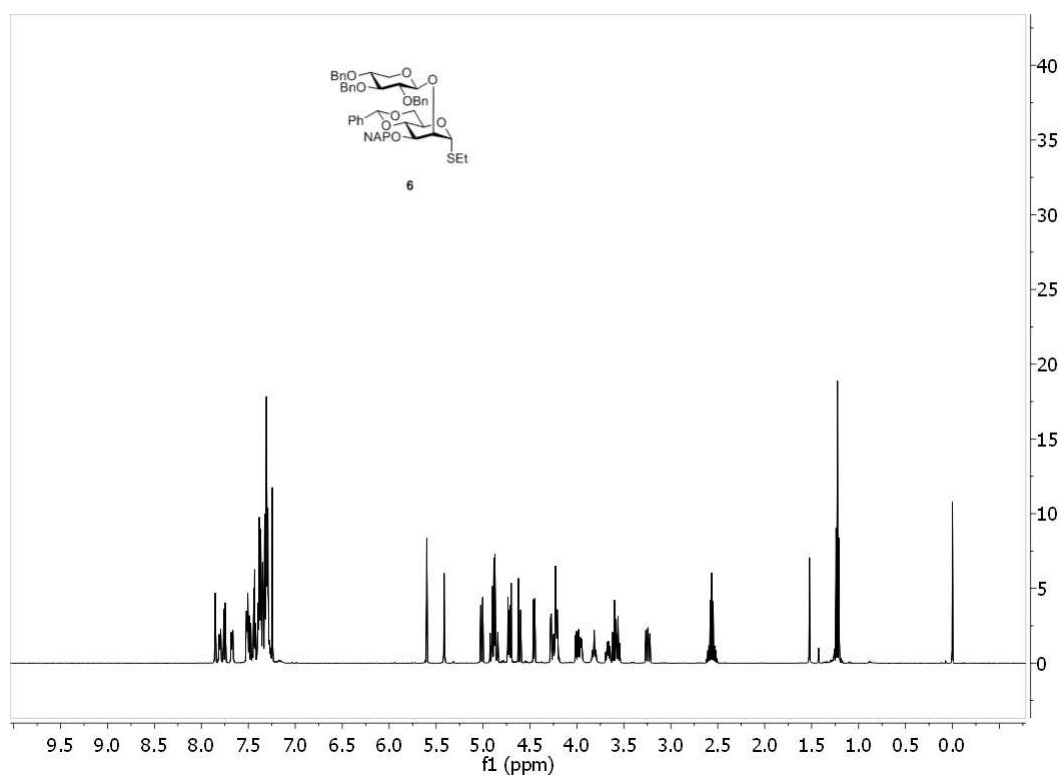

**6:**  $^{13}\text{C}$  NMR ( $\text{CDCl}_3$ , 125 MHz)

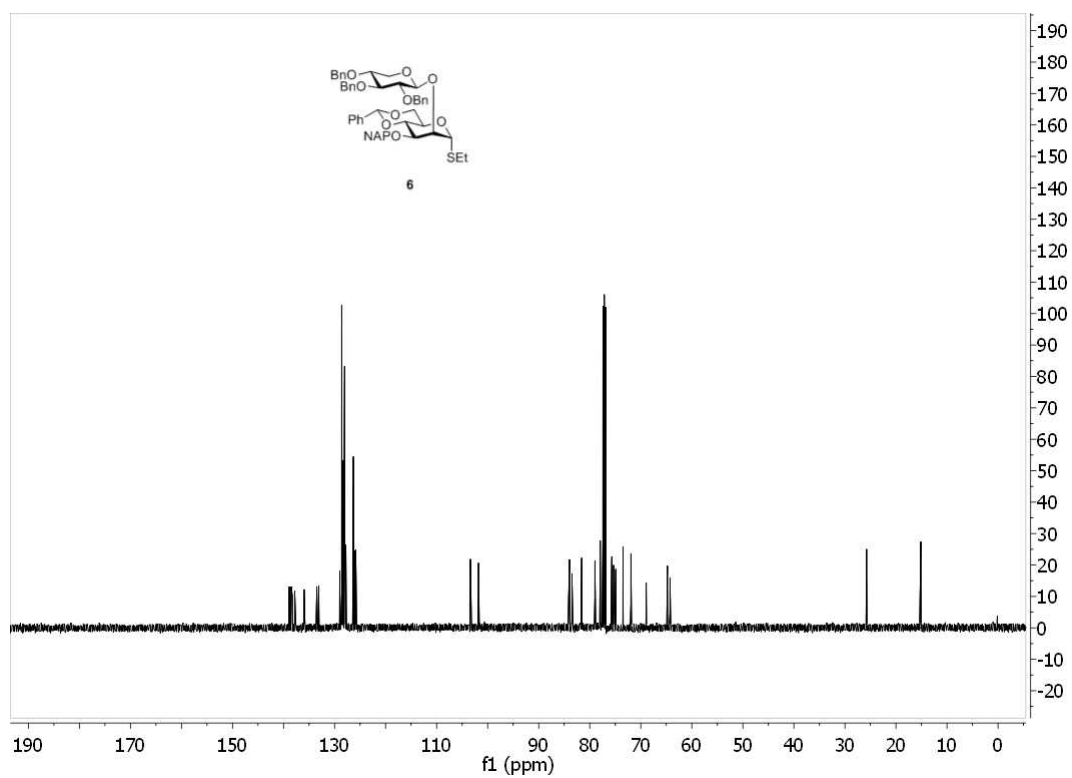

7:  $^1\text{H}$  NMR ( $\text{CDCl}_3$ , 500 MHz)

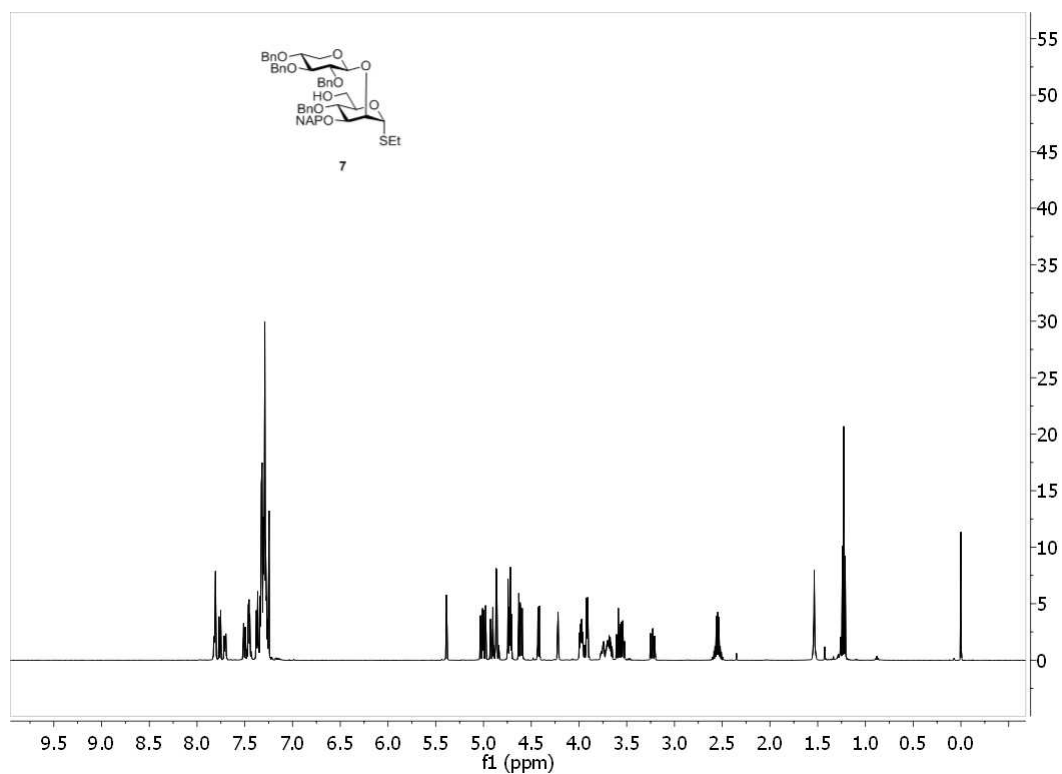

7:  $^{13}\text{C}$  NMR ( $\text{CDCl}_3$ , 125 MHz)

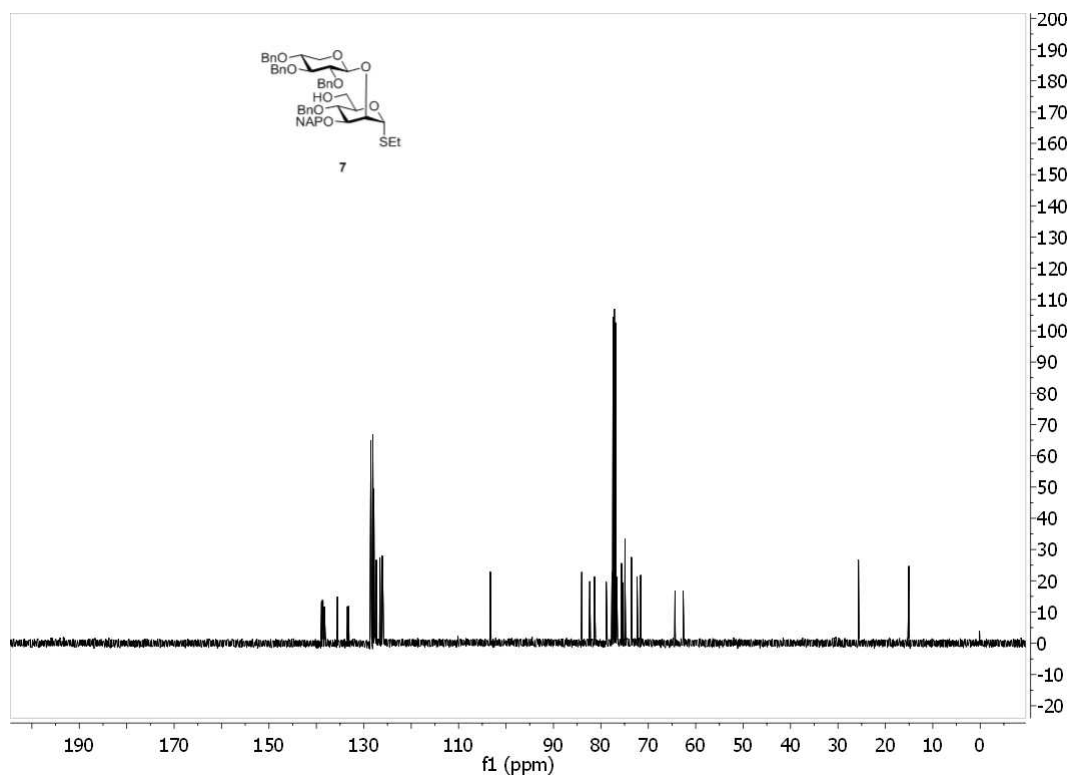

**8:**  $^1\text{H}$  NMR ( $\text{CDCl}_3$ , 500 MHz)

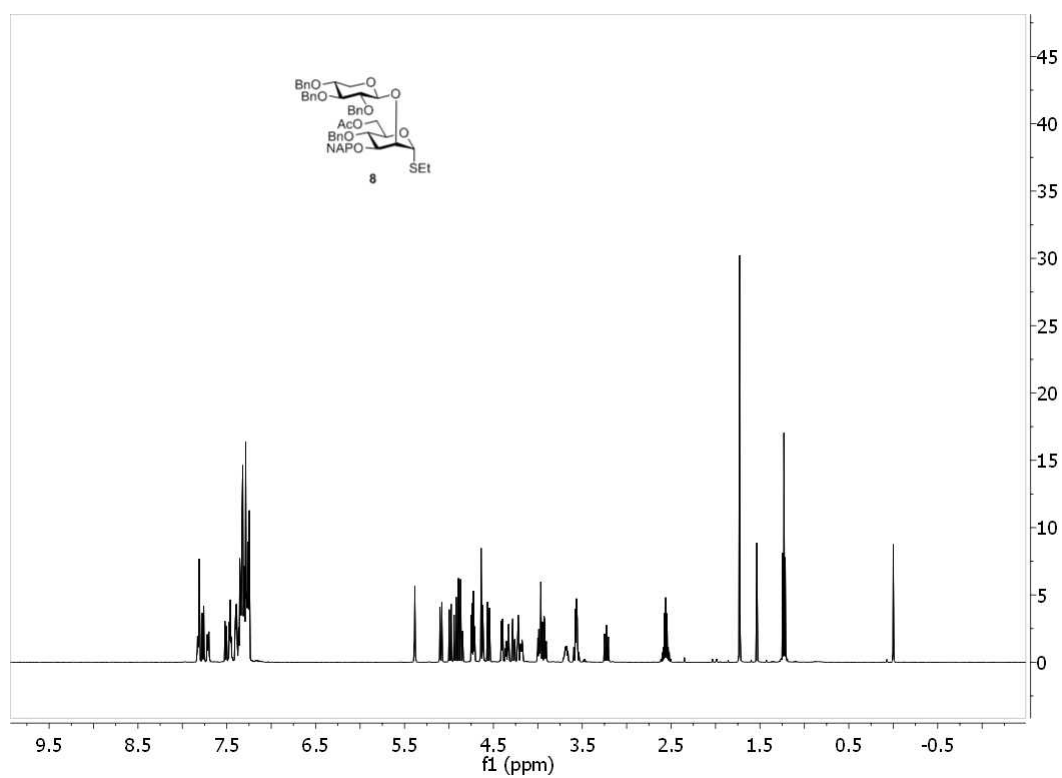

**8:**  $^{13}\text{C}$  NMR ( $\text{CDCl}_3$ , 125 MHz)

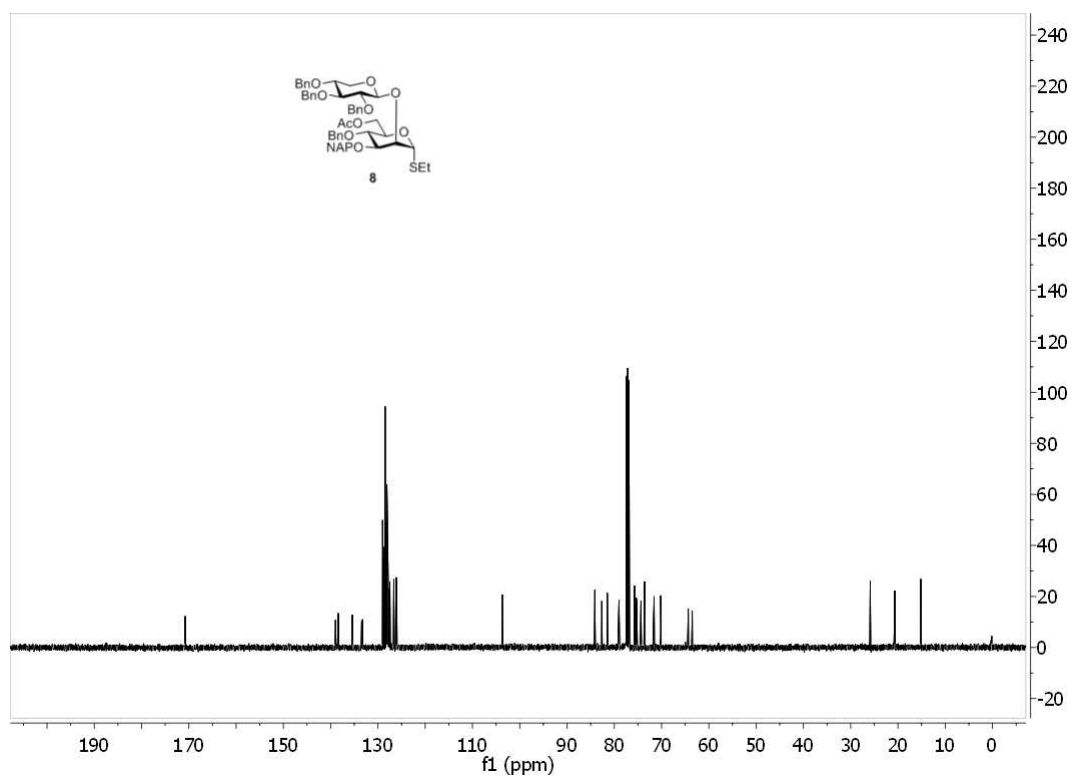

**9:**  $^1\text{H}$  NMR ( $\text{CDCl}_3$ , 500 MHz)

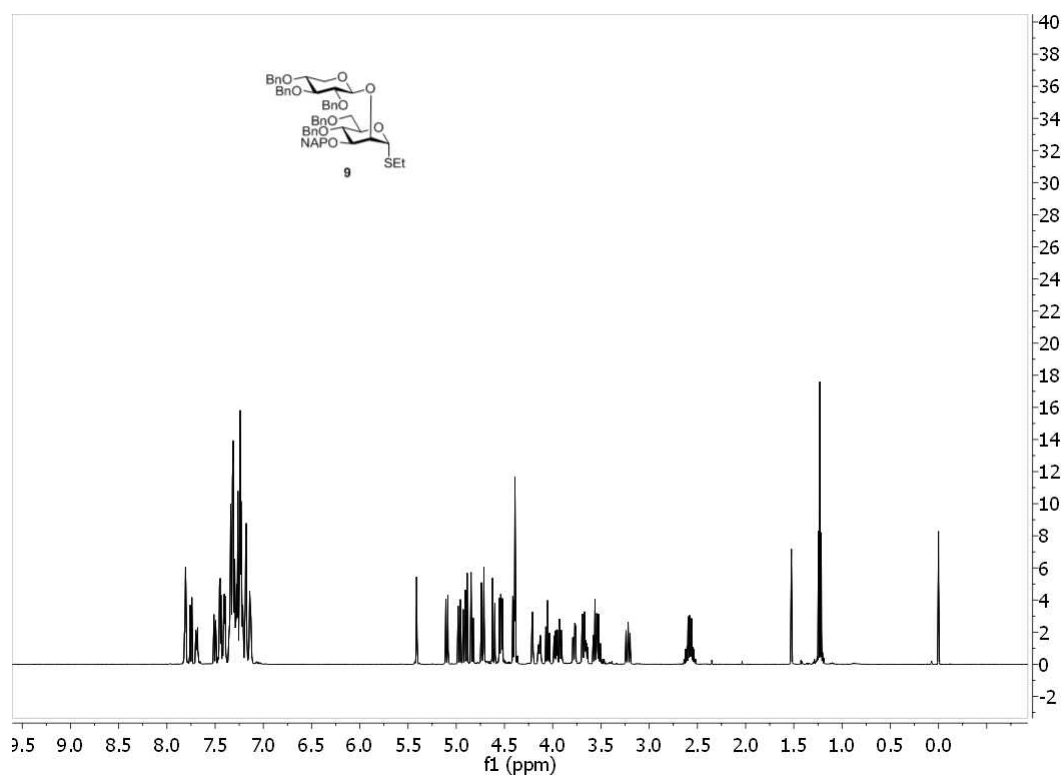

**9:**  $^{13}\text{C}$  NMR ( $\text{CDCl}_3$ , 125 MHz)

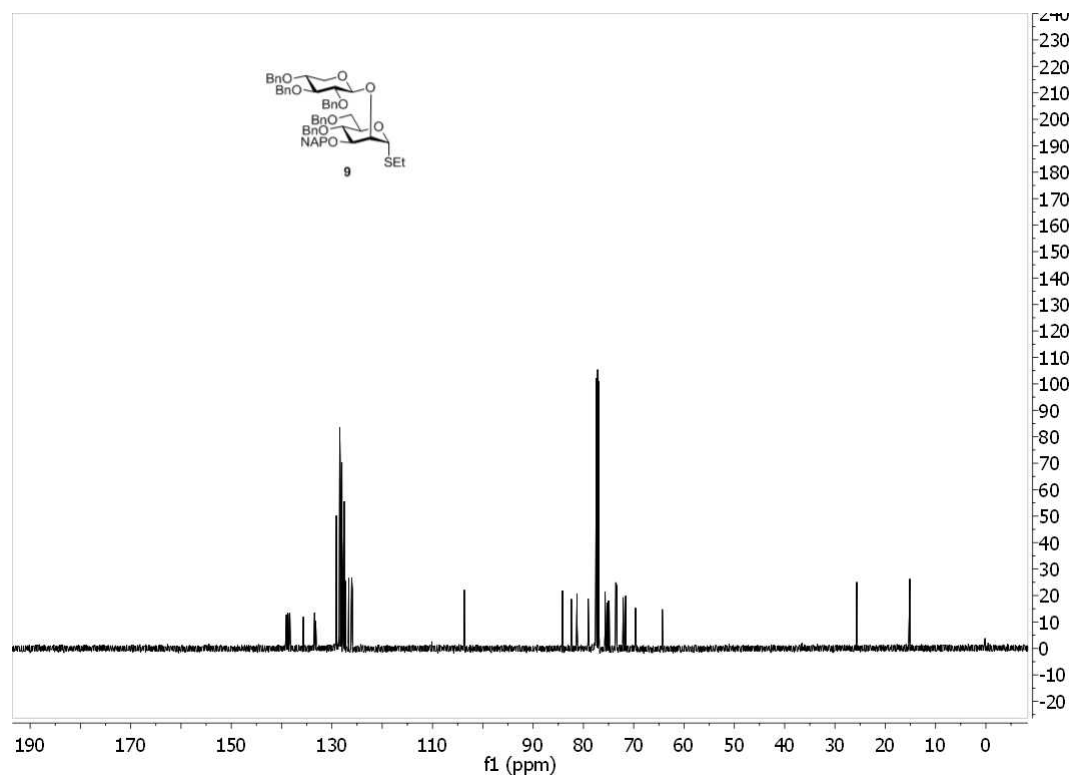



**11:**  $^1\text{H}$  NMR ( $\text{CDCl}_3$ , 500 MHz)

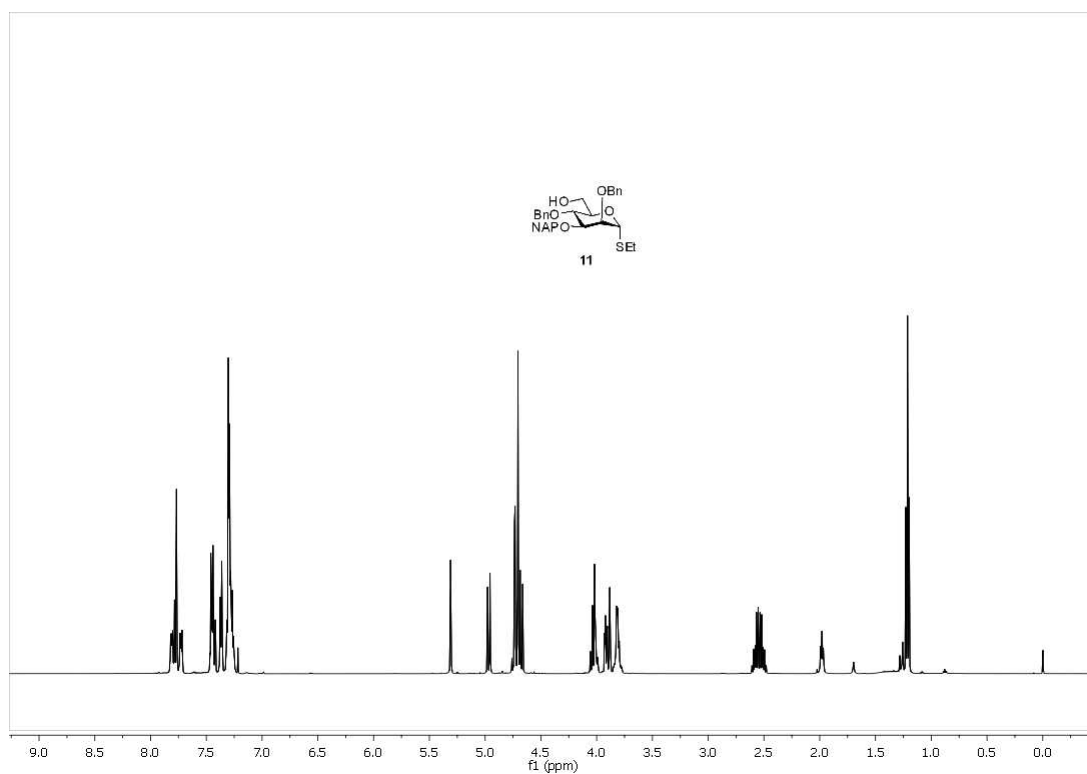

**11:**  $^{13}\text{C}$  NMR ( $\text{CDCl}_3$ , 125 MHz)

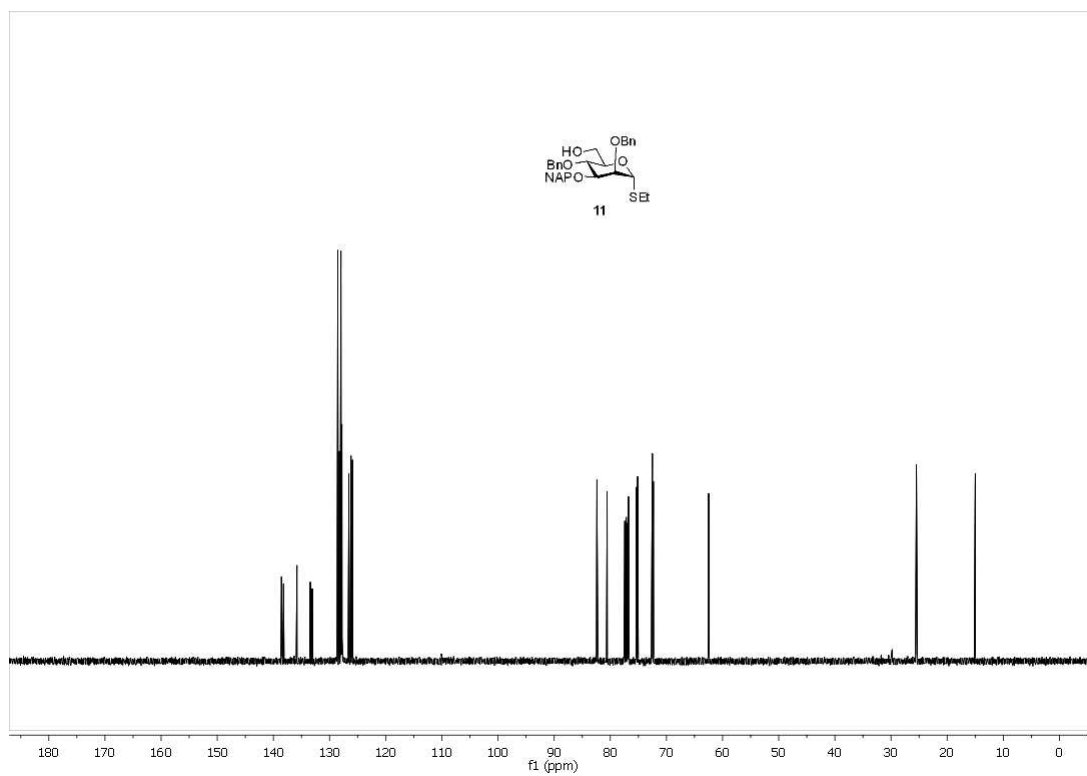

**12:**  $^1\text{H}$  NMR ( $\text{CDCl}_3$ , 500 MHz)

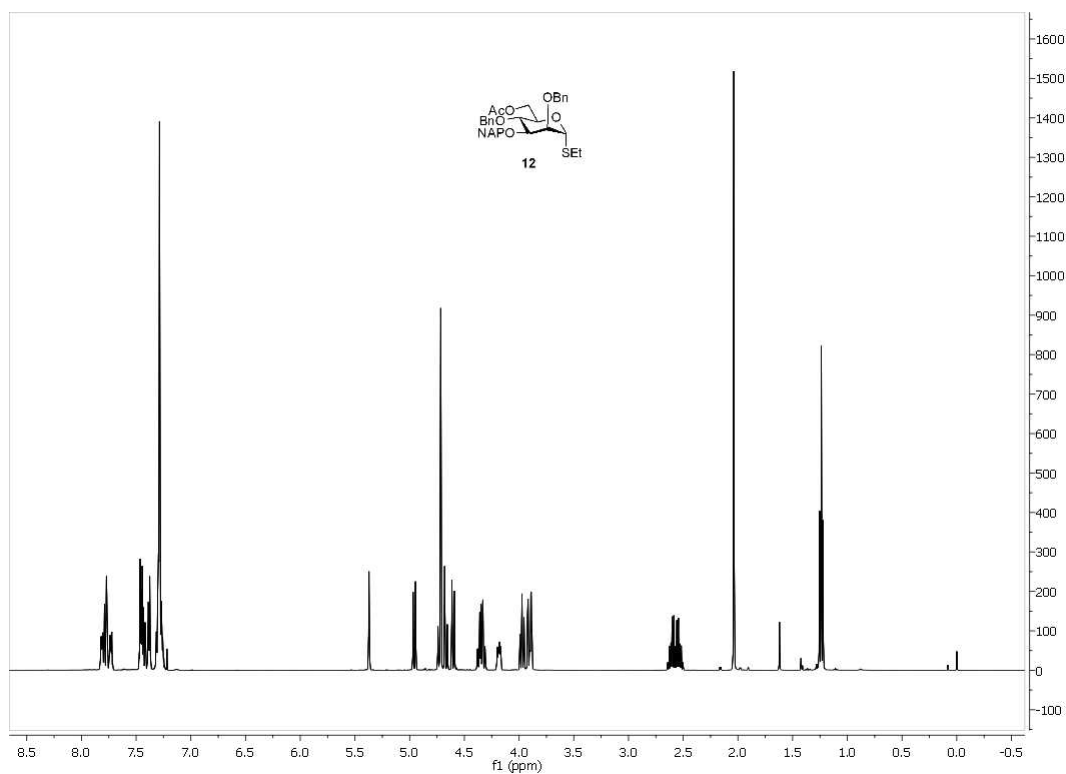

**12:**  $^{13}\text{C}$  NMR ( $\text{CDCl}_3$ , 125 MHz)

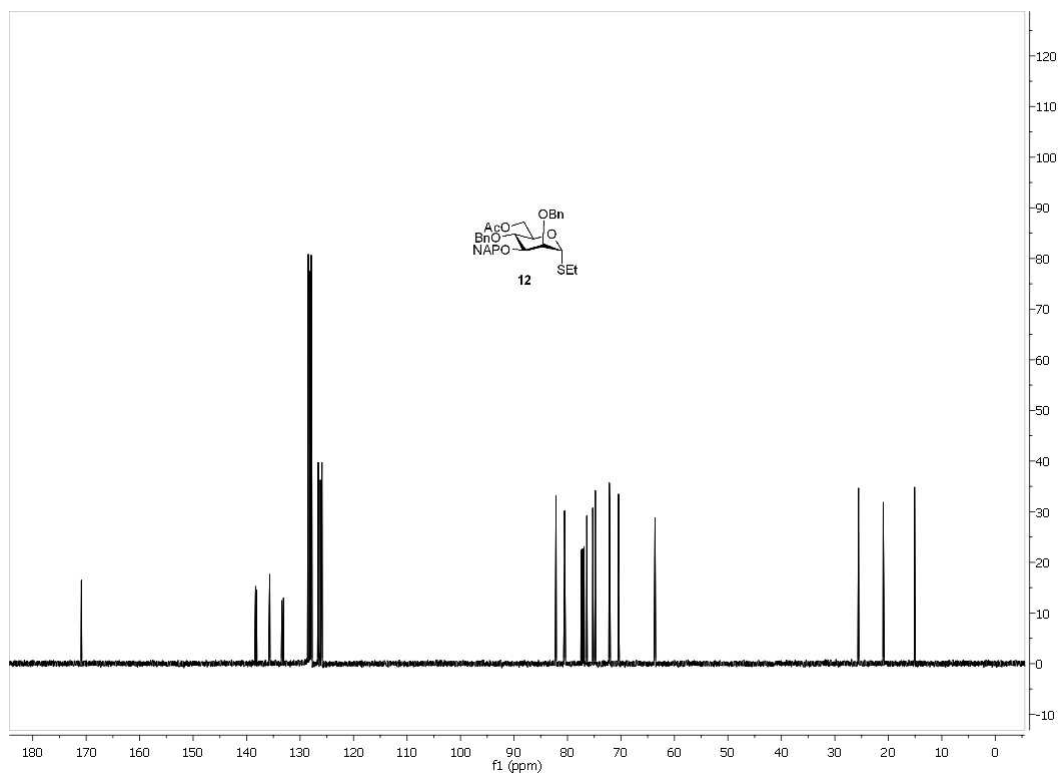

**13:**  $^1\text{H}$  NMR ( $\text{CDCl}_3$ , 500 MHz)

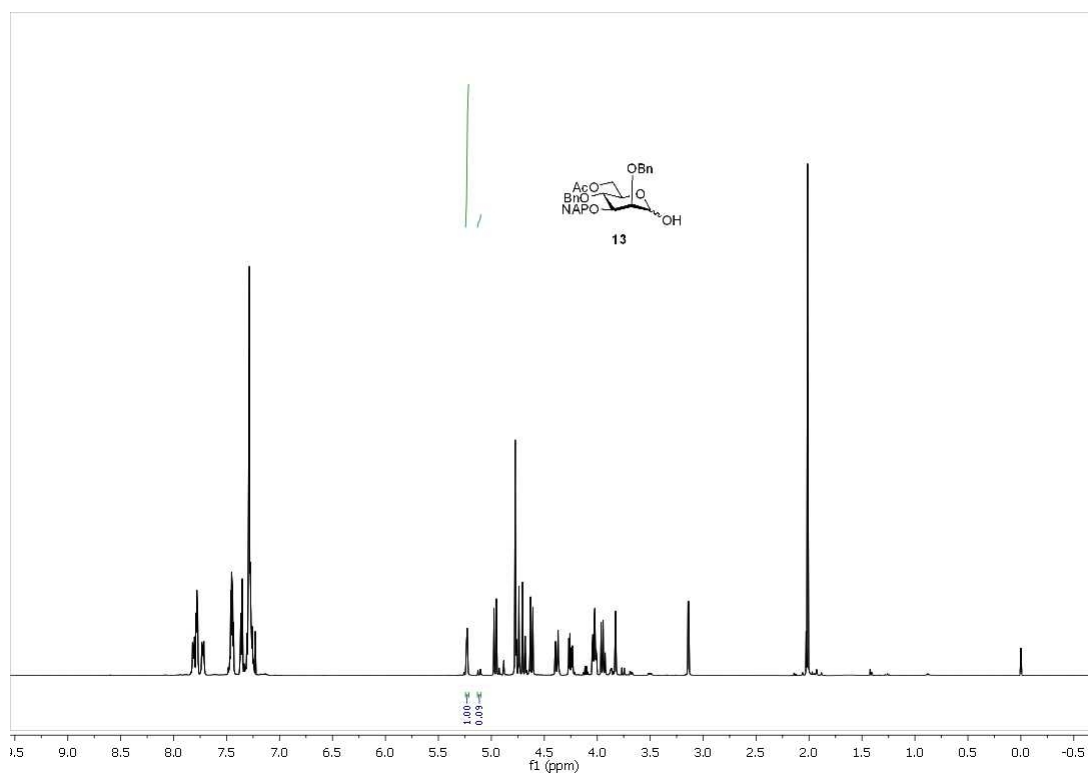

**13:**  $^{13}\text{C}$  NMR ( $\text{CDCl}_3$ , 125 MHz)

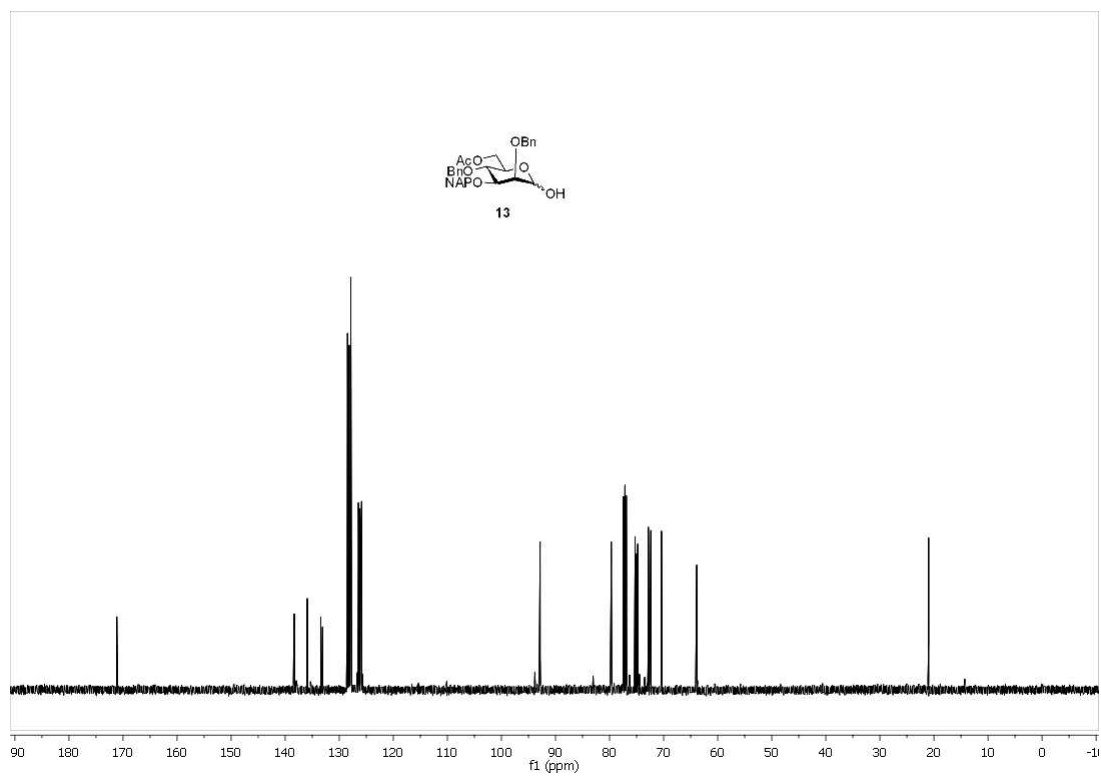

**15:**  $^1\text{H}$  NMR ( $\text{CDCl}_3$ , 500 MHz)

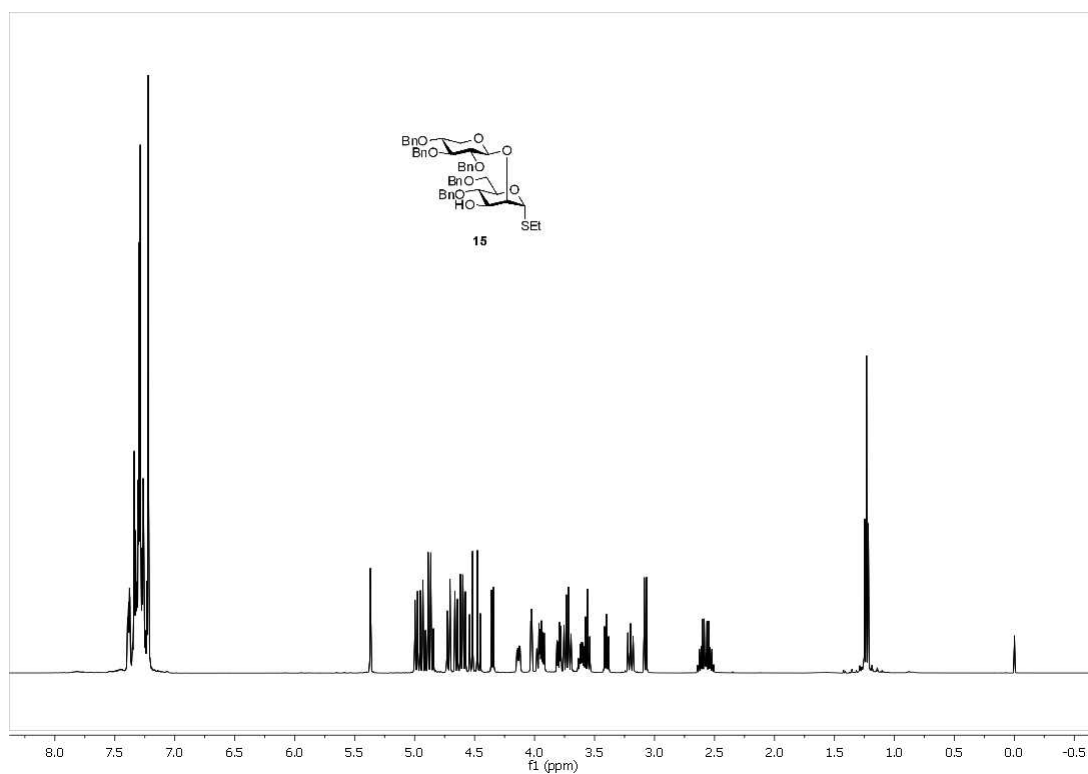

**15:**  $^{13}\text{C}$  NMR ( $\text{CDCl}_3$ , 125 MHz)

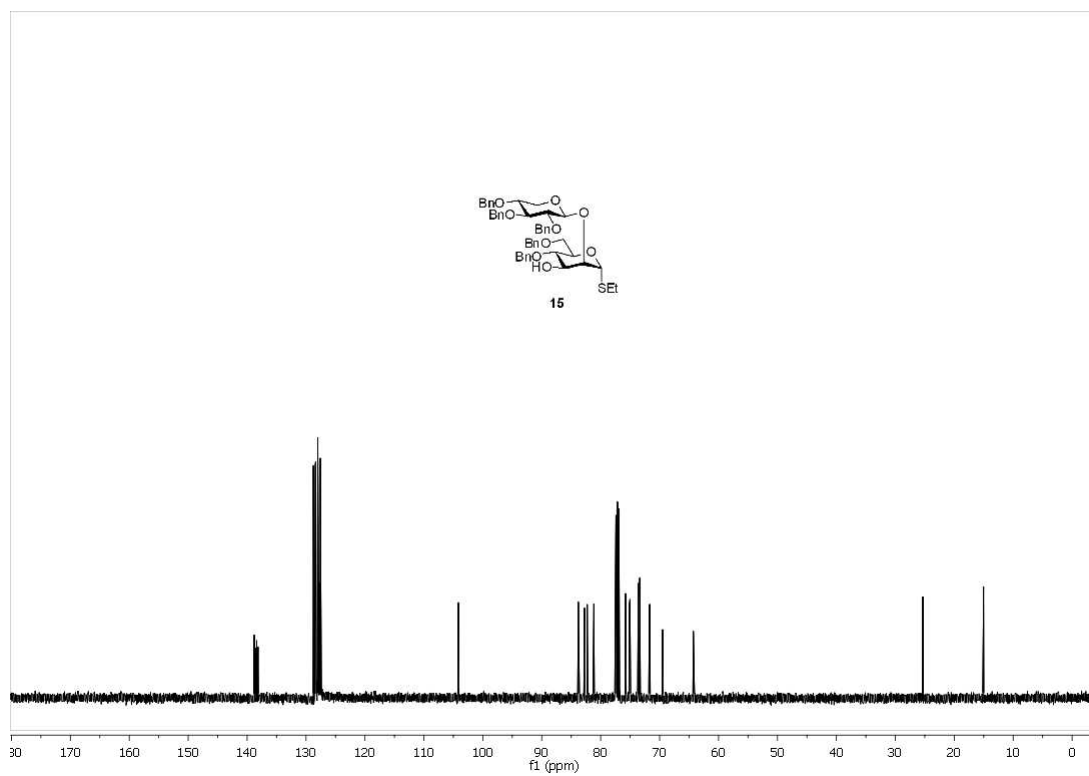

**16:**  $^1\text{H}$  NMR ( $\text{CDCl}_3$ , 500 MHz)

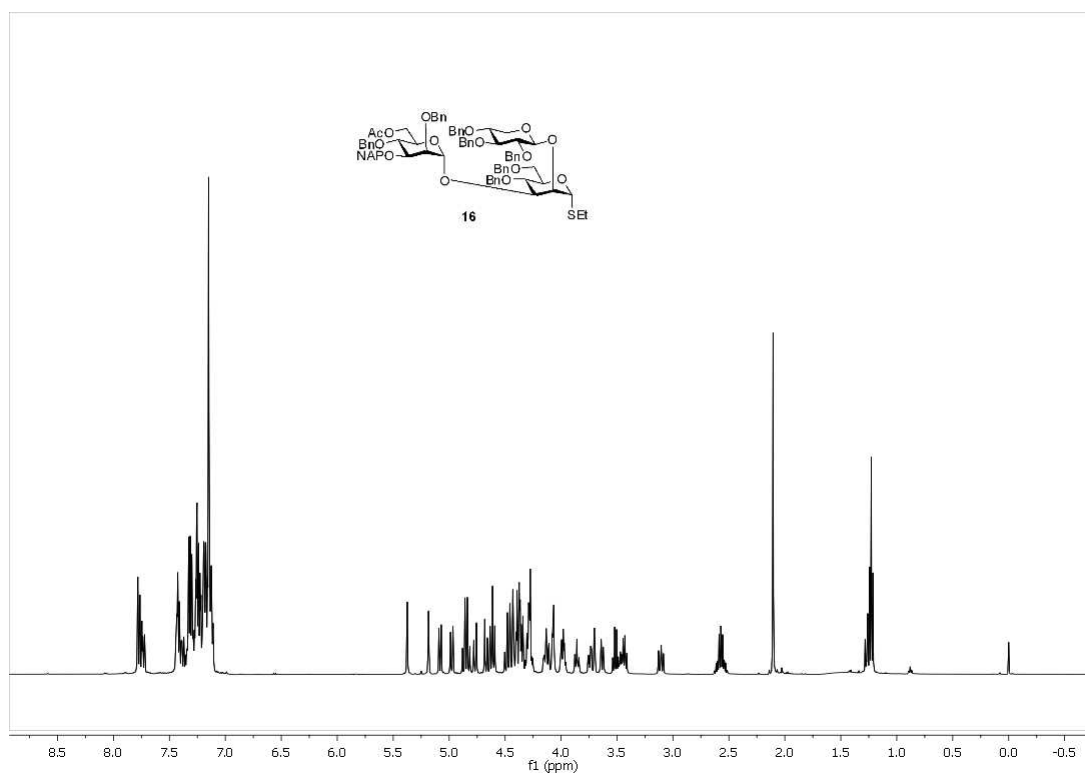

**16:**  $^{13}\text{C}$  NMR ( $\text{CDCl}_3$ , 125 MHz)

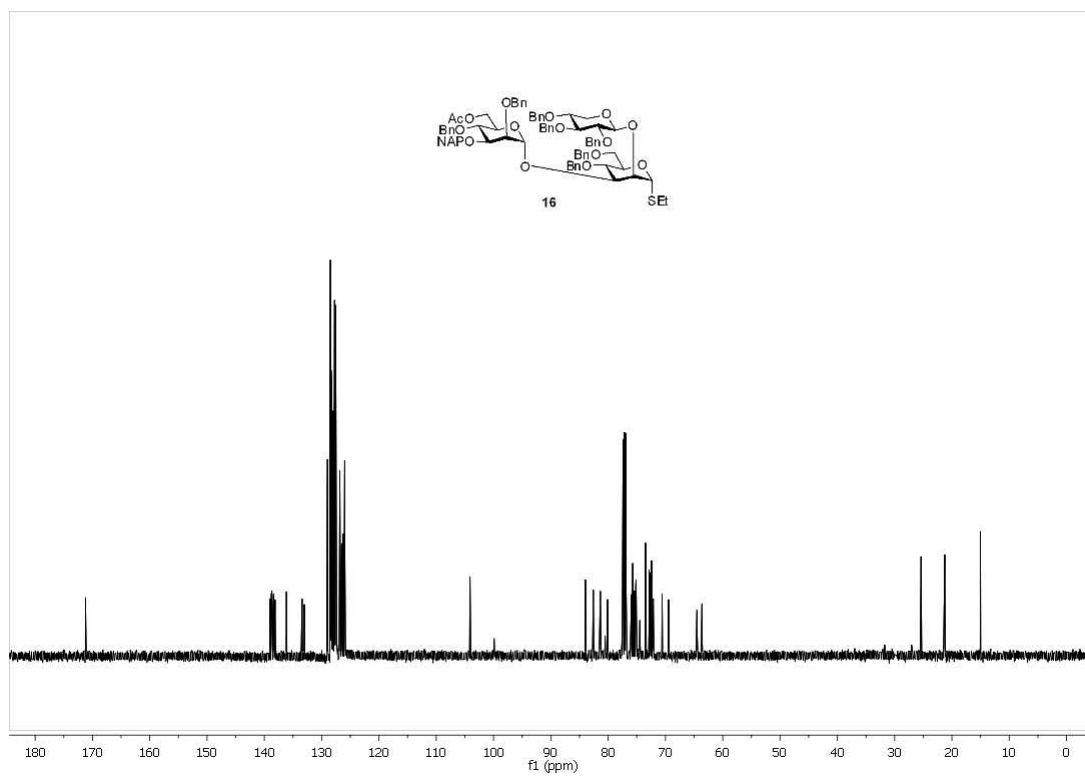

**17:**  $^1\text{H}$  NMR ( $\text{CDCl}_3$ , 500 MHz)

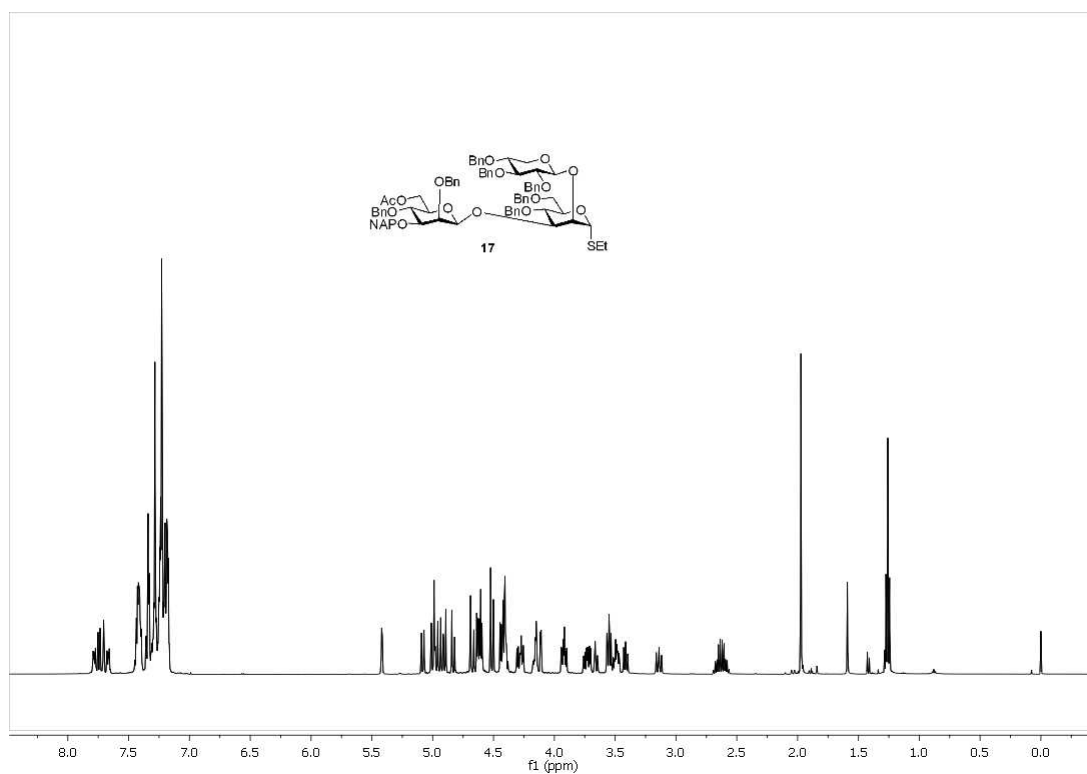

**17:**  $^{13}\text{C}$  NMR ( $\text{CDCl}_3$ , 125 MHz)

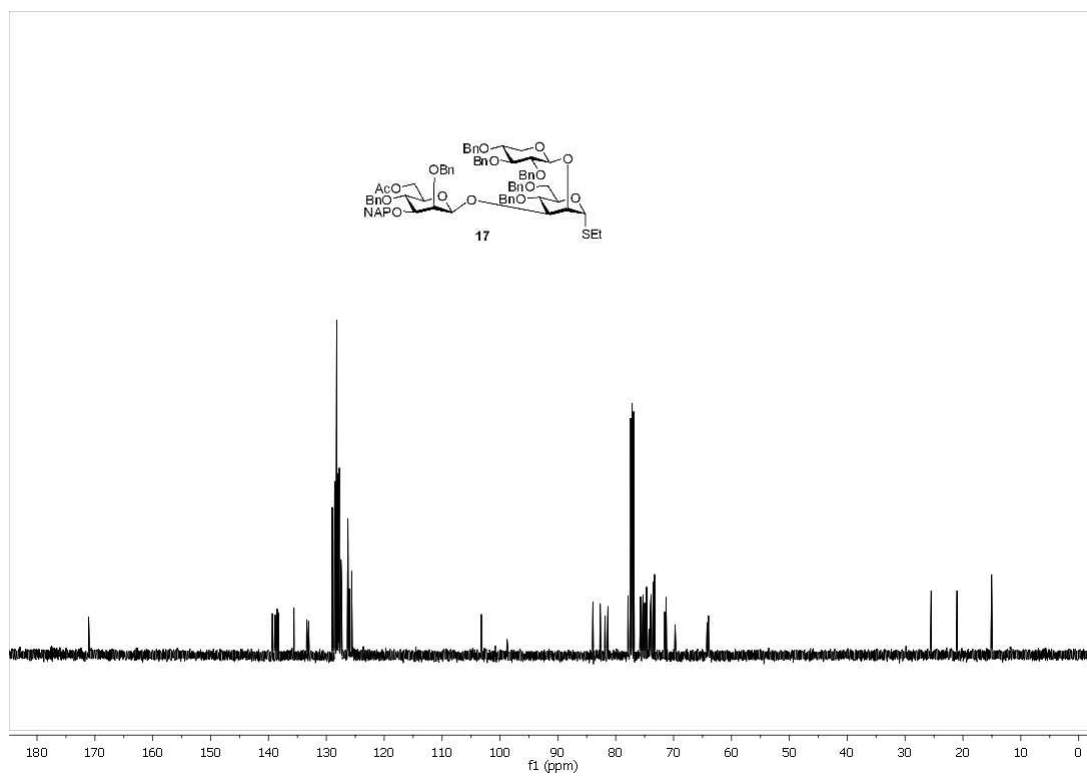

**18:**  $^1\text{H}$  NMR ( $\text{CDCl}_3$ , 500 MHz)

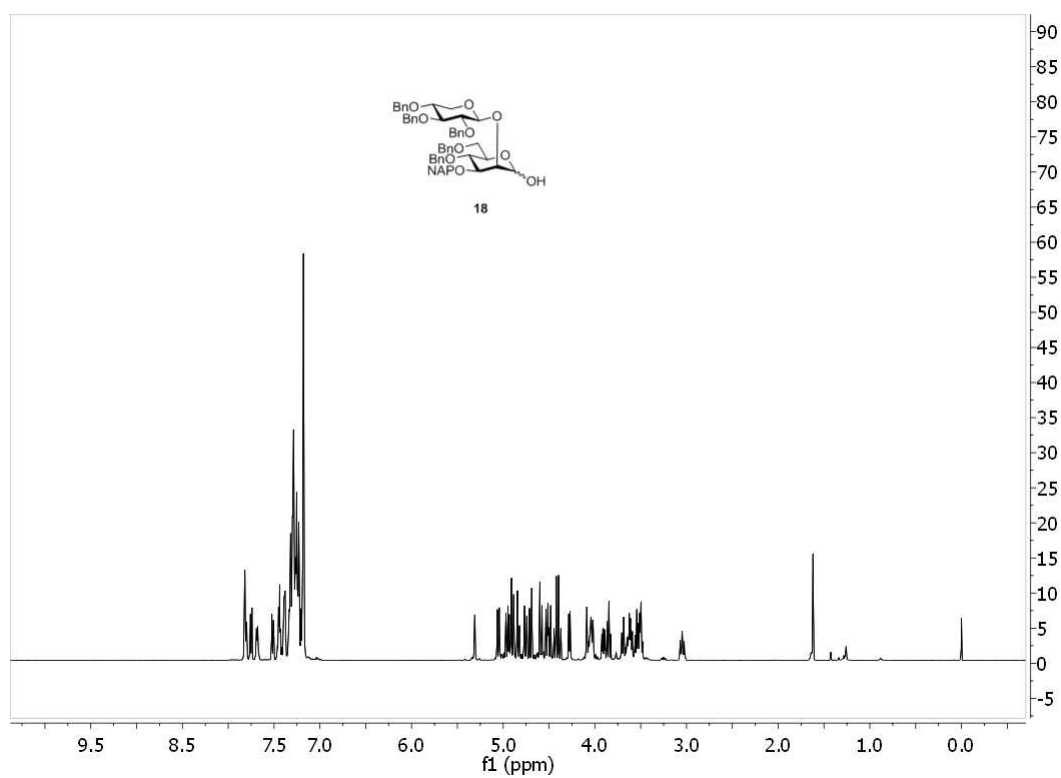

**18:**  $^{13}\text{C}$  NMR ( $\text{CDCl}_3$ , 125 MHz)

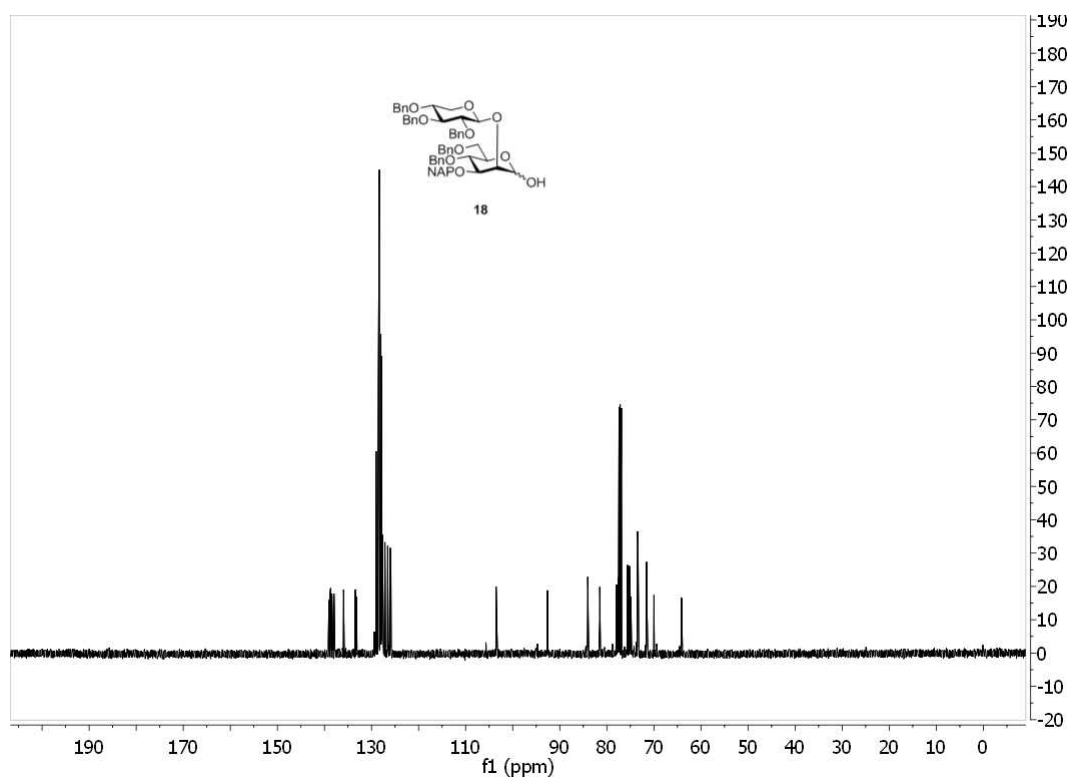

**20:**  $^1\text{H}$  NMR ( $\text{CDCl}_3$ , 500 MHz)

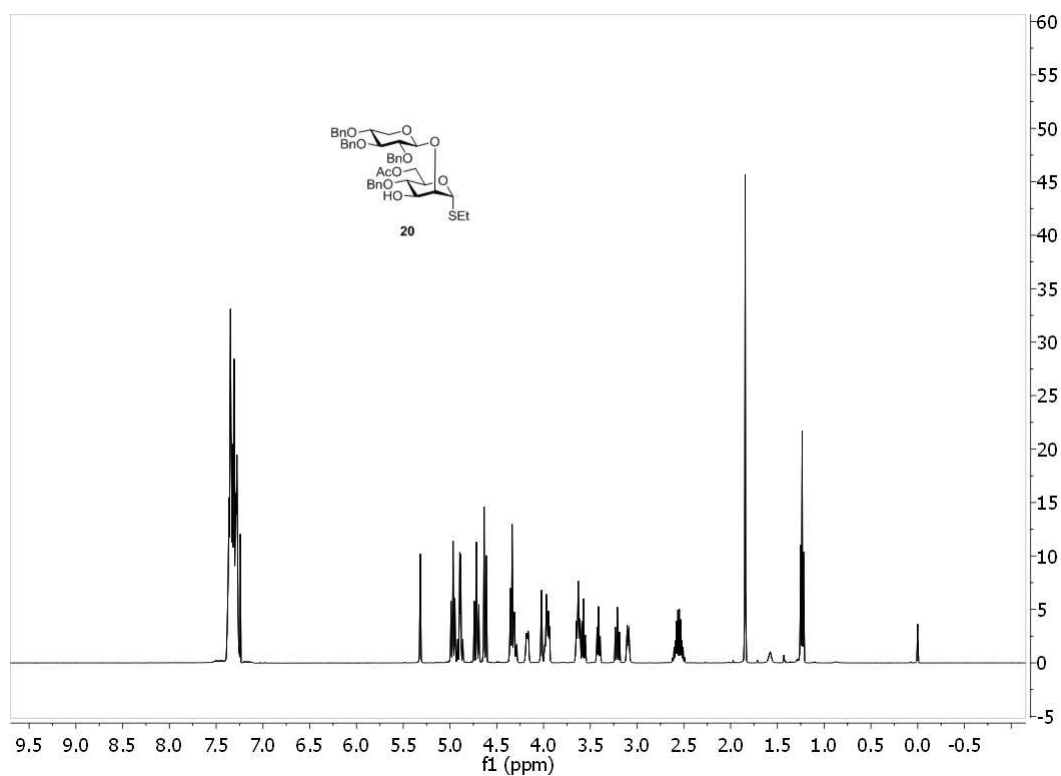

**20:**  $^{13}\text{C}$  NMR ( $\text{CDCl}_3$ , 125 MHz)

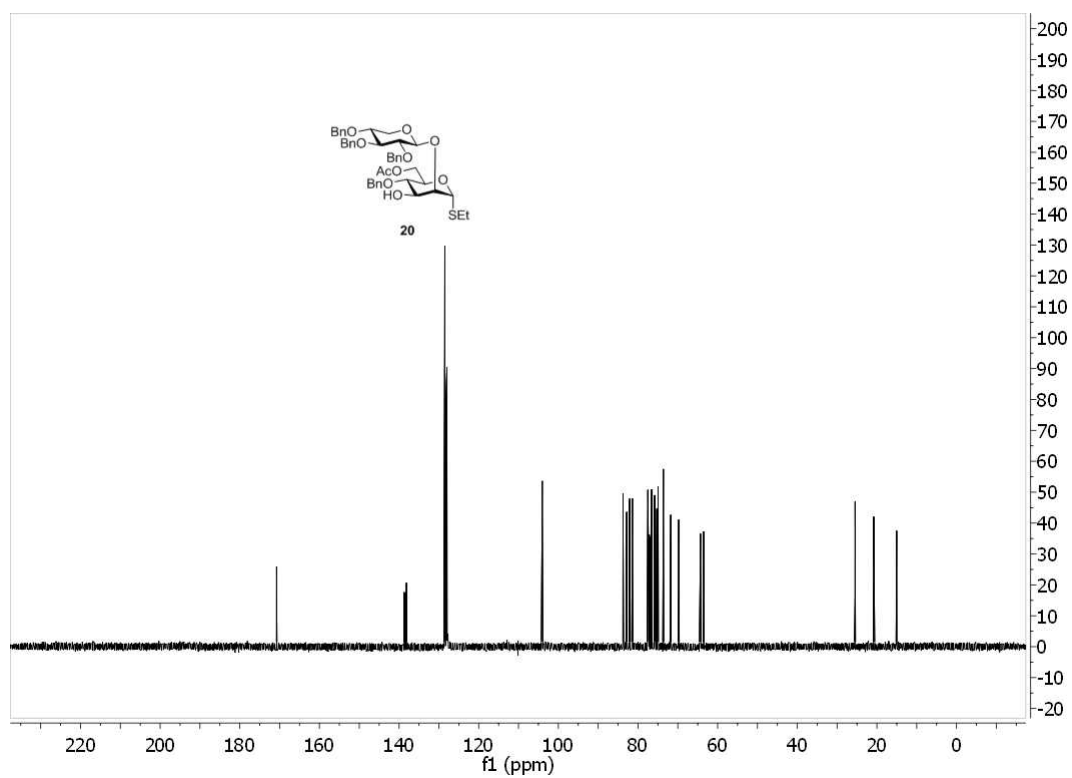



**21:**  $^1\text{H}$  NMR ( $\text{CDCl}_3$ , 500 MHz)

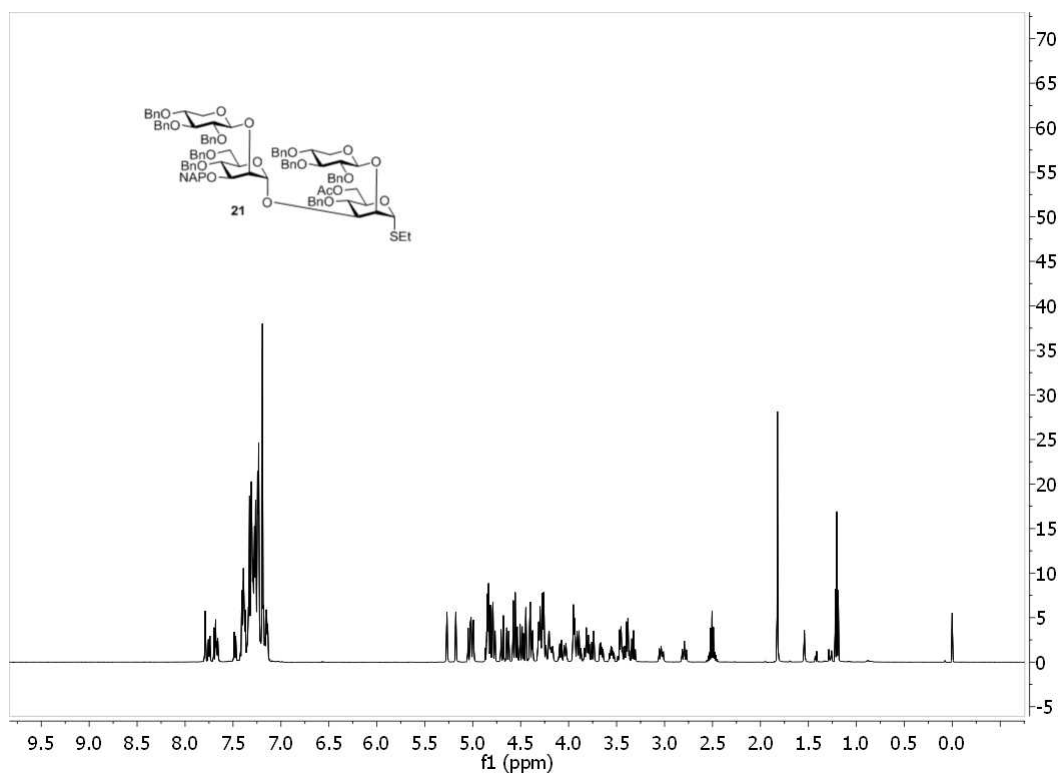

**21:**  $^{13}\text{C}$  NMR ( $\text{CDCl}_3$ , 125 MHz)

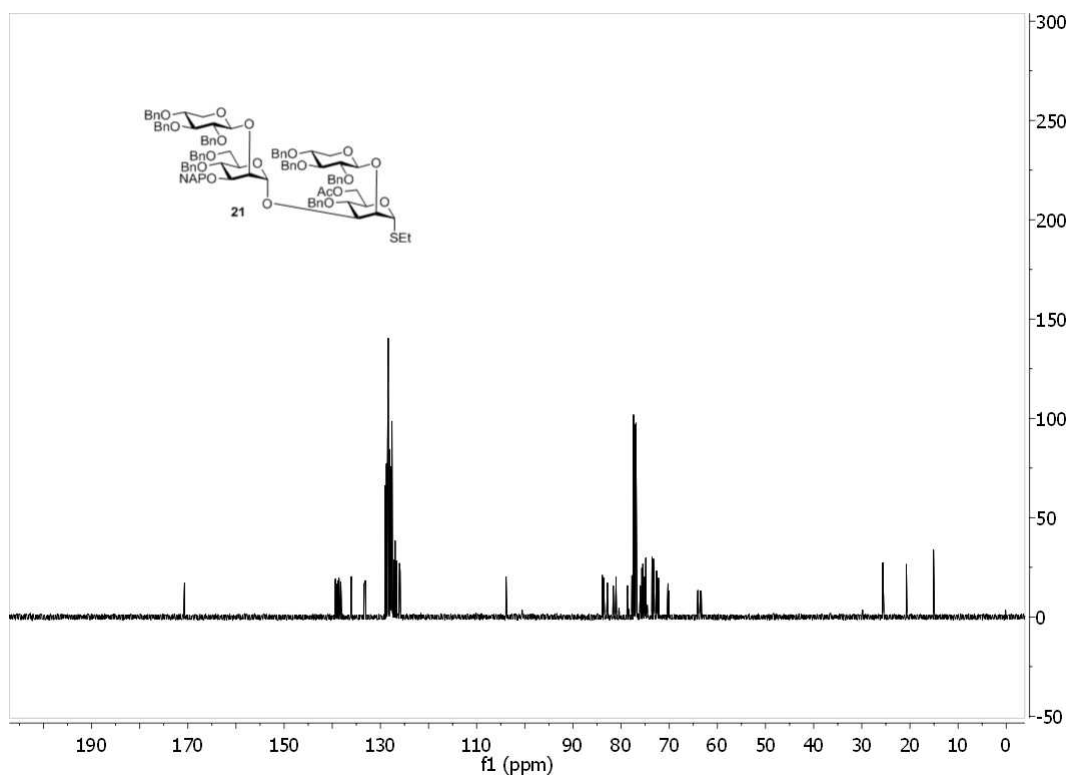

**23:**  $^1\text{H}$  NMR ( $\text{CDCl}_3$ , 600 MHz)

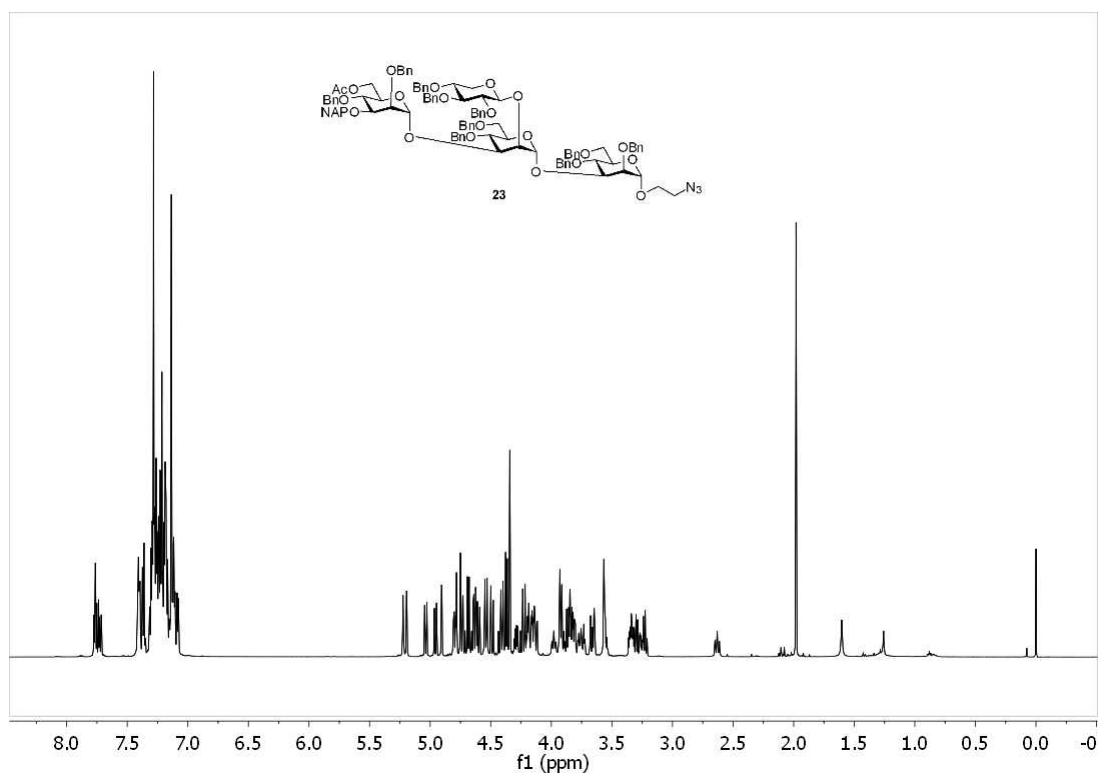

**23:**  $^{13}\text{C}$  NMR ( $\text{CDCl}_3$ , 150 MHz)

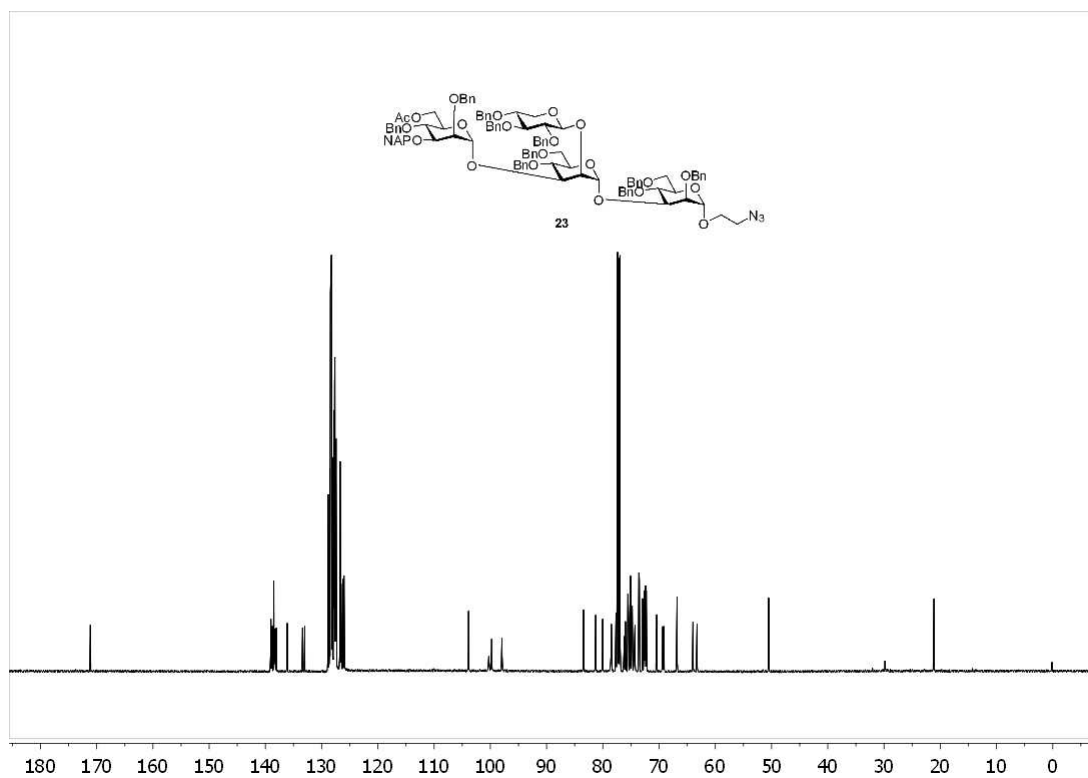

23:  $^1\text{H}$   $^{13}\text{C}$  HSQC ( $\text{CDCl}_3$ , 600 MHz)

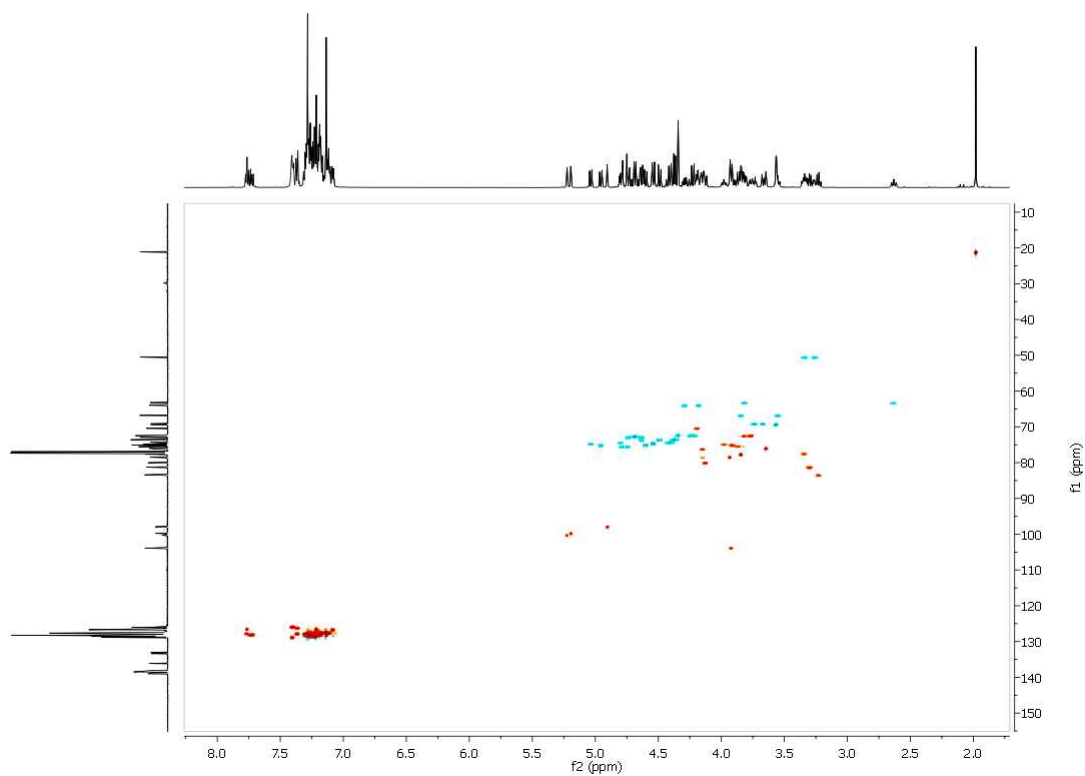

24:  $^1\text{H}$  NMR ( $\text{CDCl}_3$ , 500 MHz)

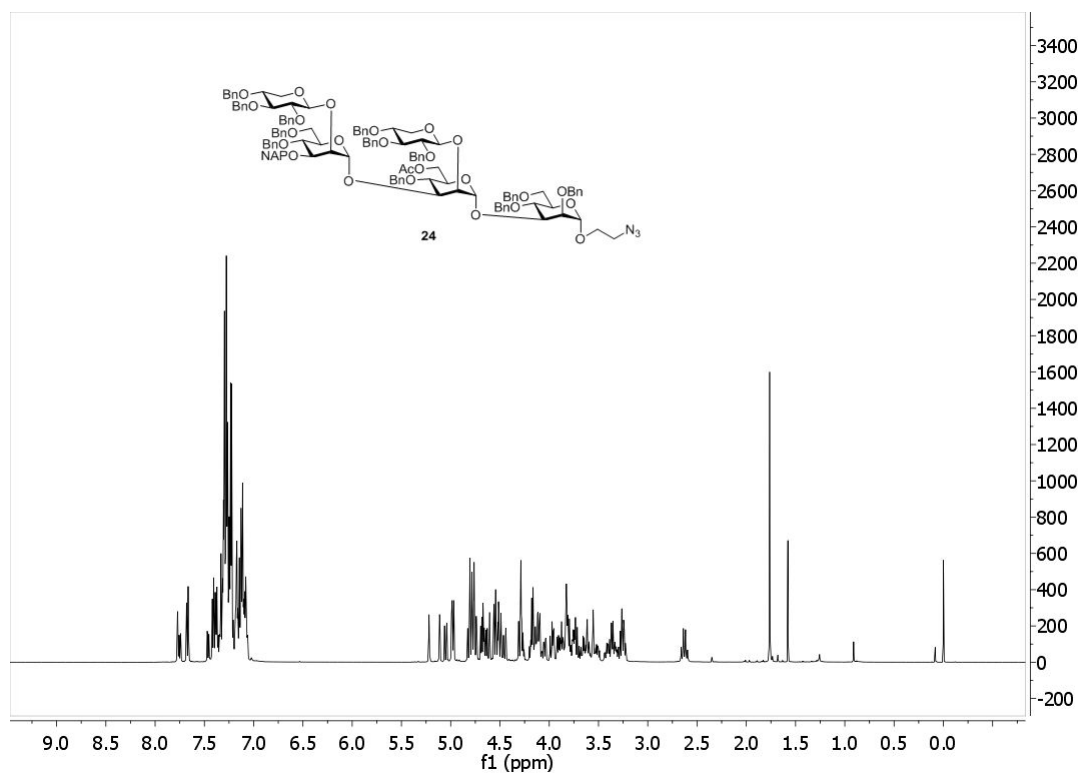

24:  $^{13}\text{C}$  NMR ( $\text{CDCl}_3$ , 125 MHz)

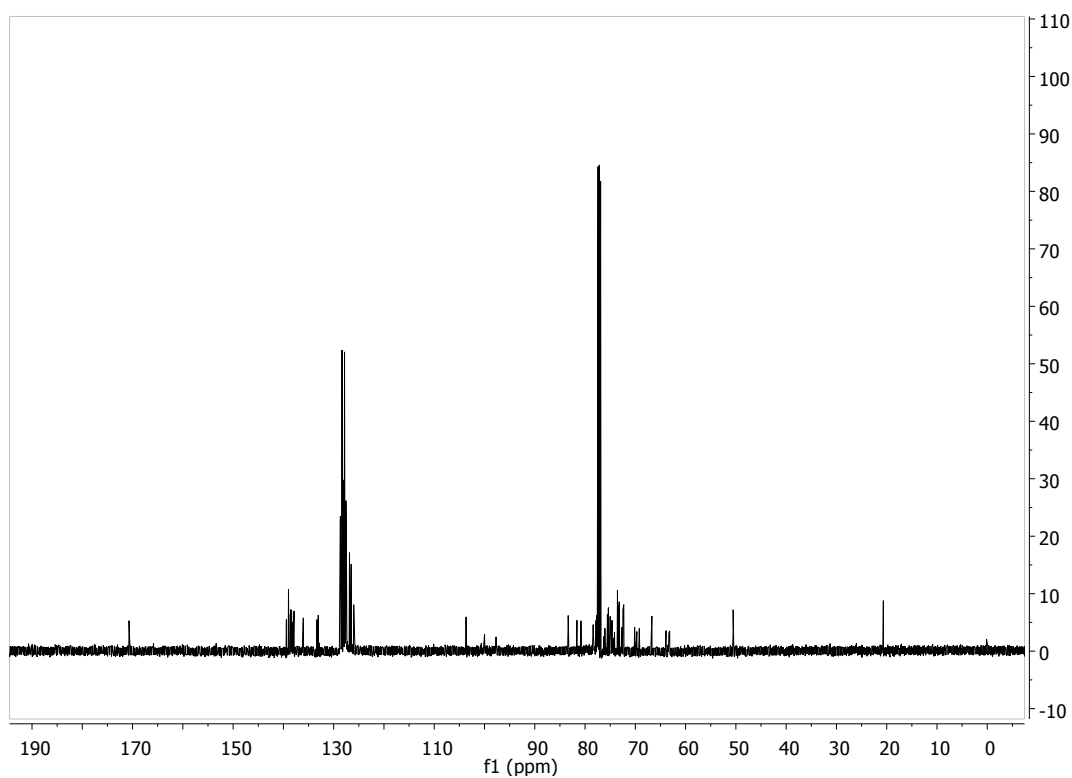

24:  $^1\text{H}$   $^{13}\text{C}$  HSQC ( $\text{CDCl}_3$ , 500 MHz)

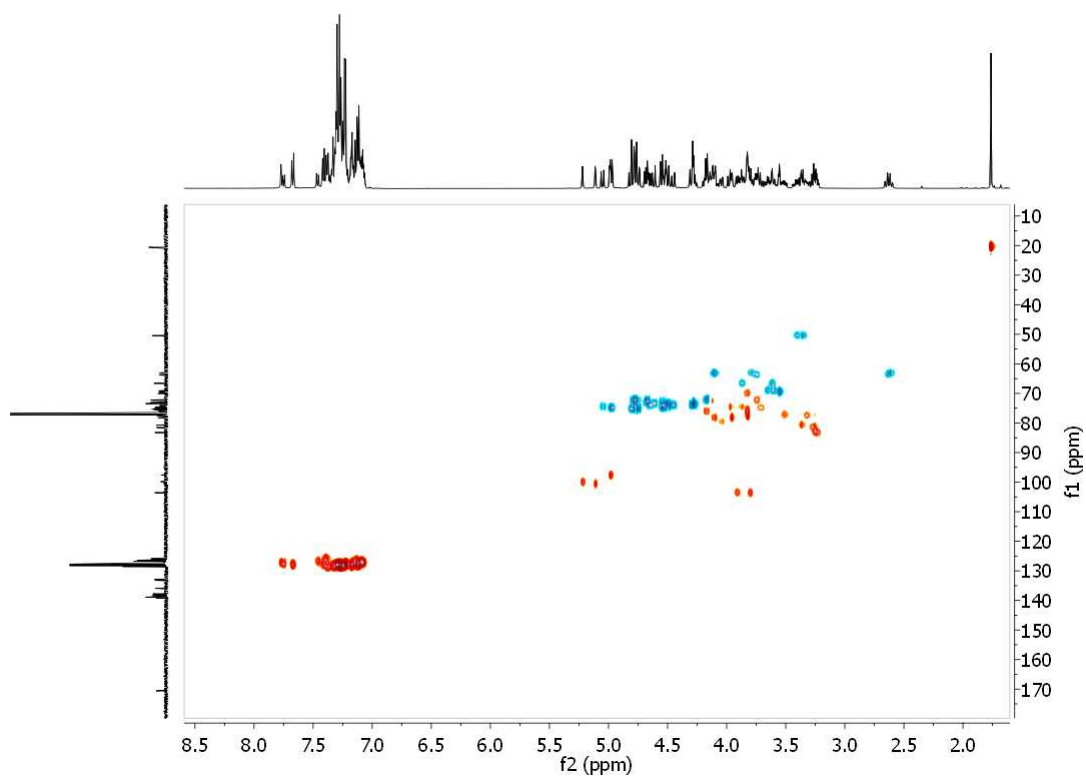

**25:**  $^1\text{H}$  NMR ( $\text{CDCl}_3$ , 500 MHz)

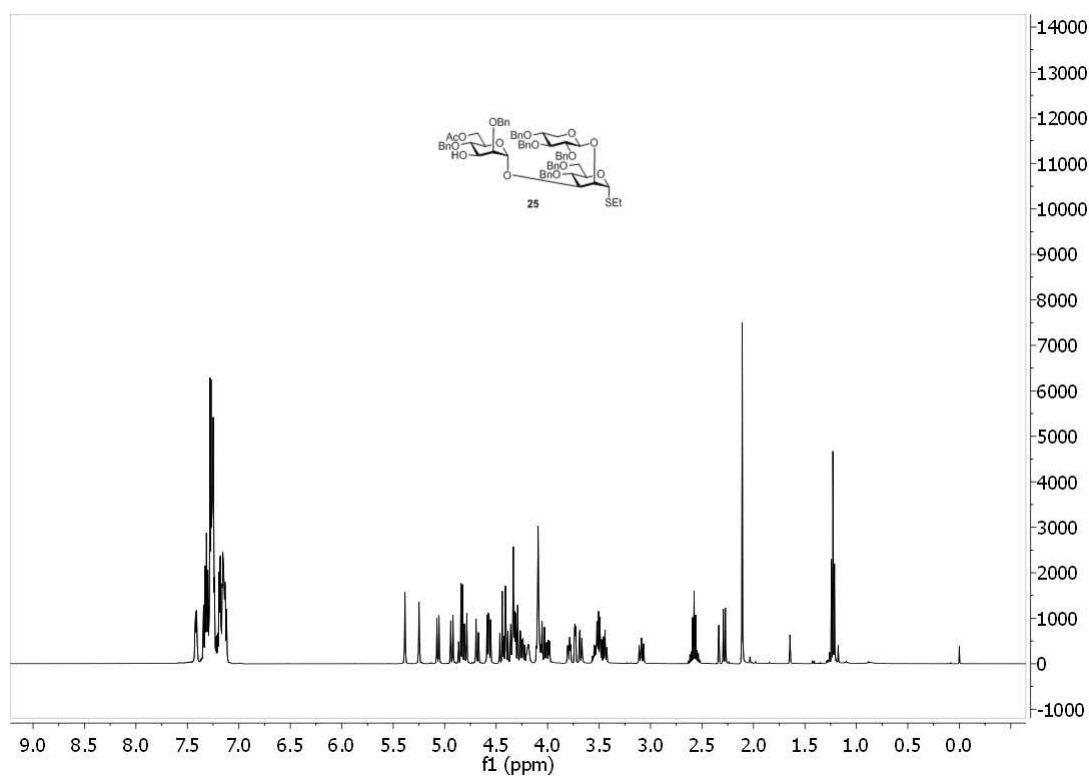

**25:**  $^{13}\text{C}$  NMR ( $\text{CDCl}_3$ , 125 MHz)

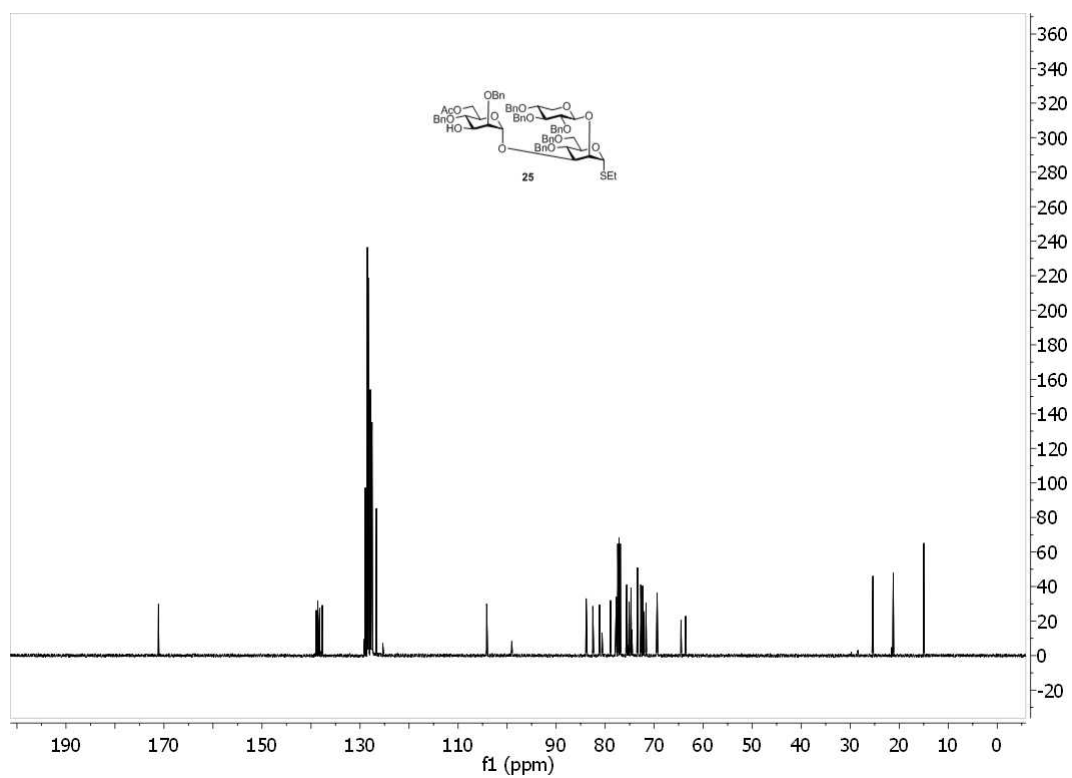

25:  $^1\text{H}$   $^{13}\text{C}$  HSQC ( $\text{CDCl}_3$ , 500 MHz)

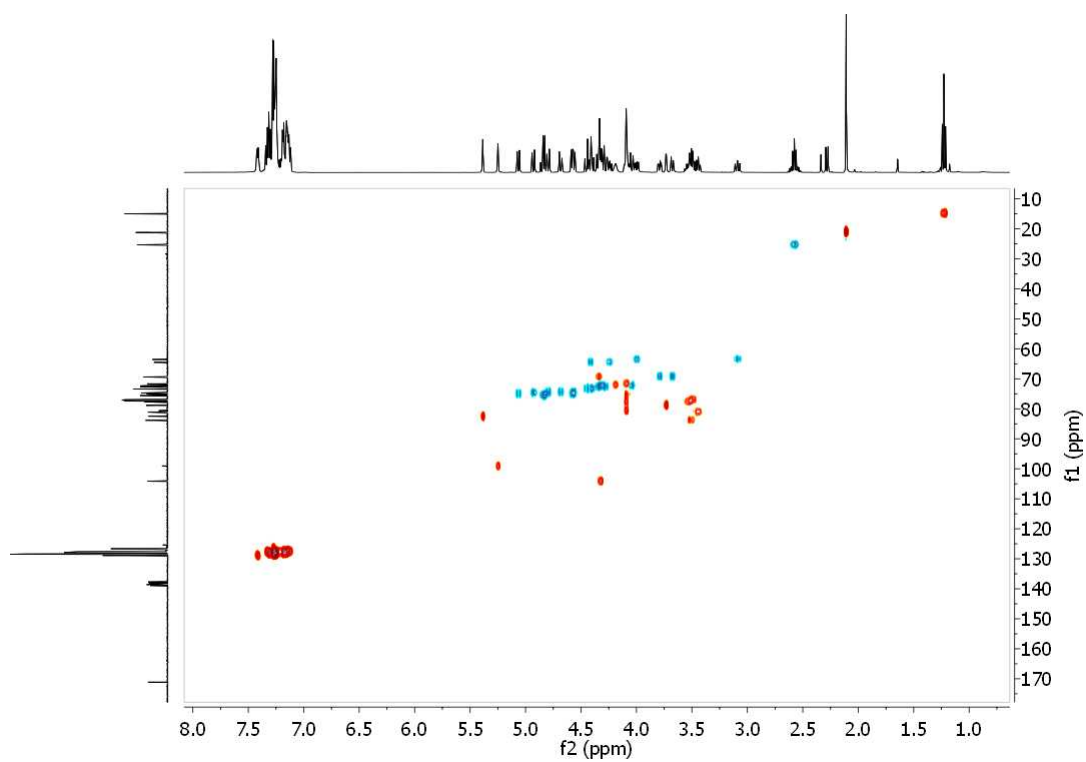

26:  $^1\text{H}$  NMR ( $\text{CDCl}_3$ , 500 MHz)

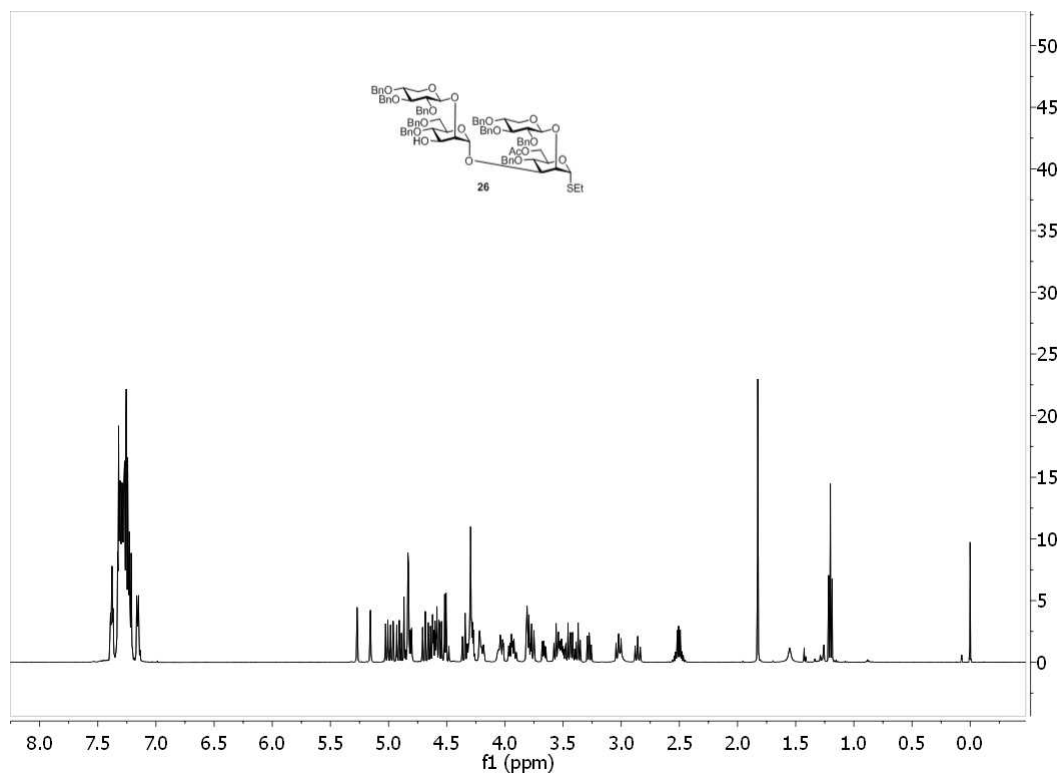

26:  $^{13}\text{C}$  NMR ( $\text{CDCl}_3$ , 125 MHz)

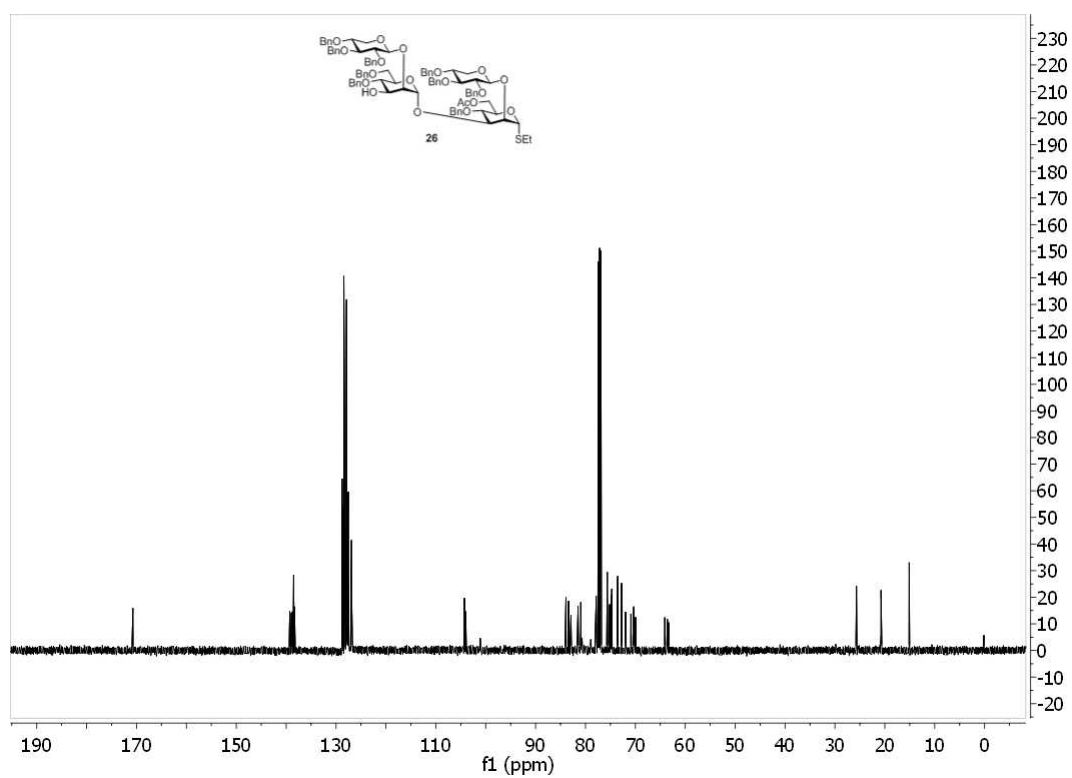

26:  $^1\text{H}$   $^{13}\text{C}$  HSQC ( $\text{CDCl}_3$ , 500 MHz)

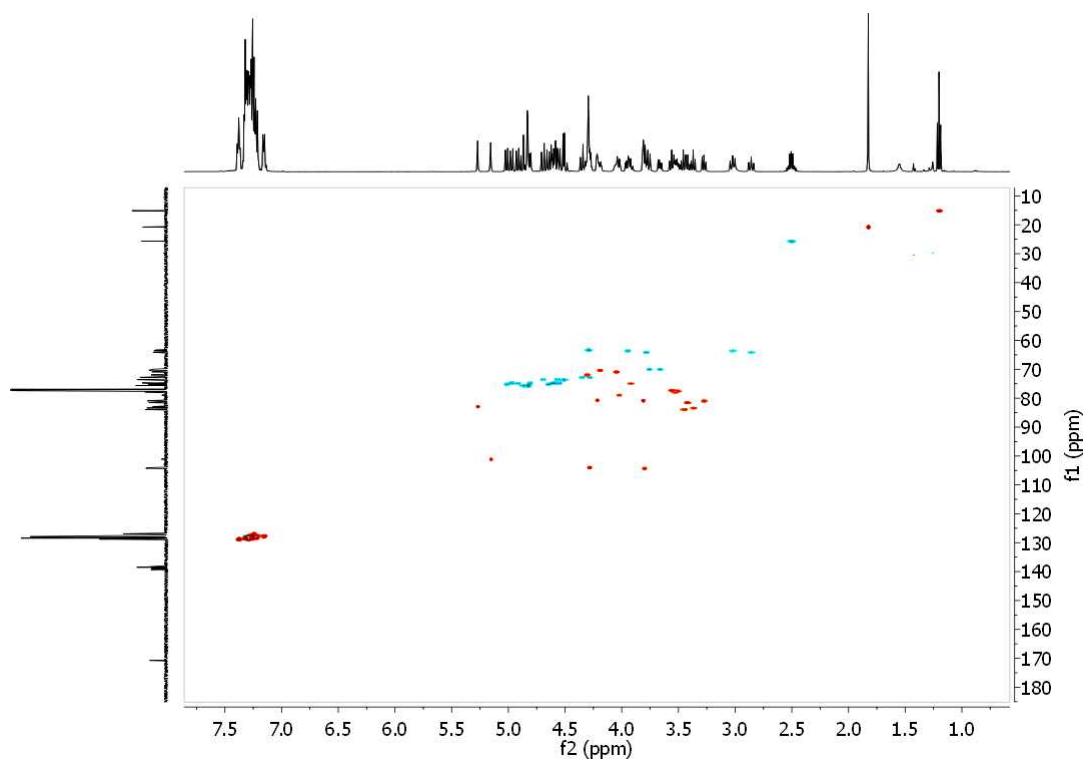

27:  $^1\text{H}$  NMR ( $\text{D}_2\text{O}$ , 600 MHz)

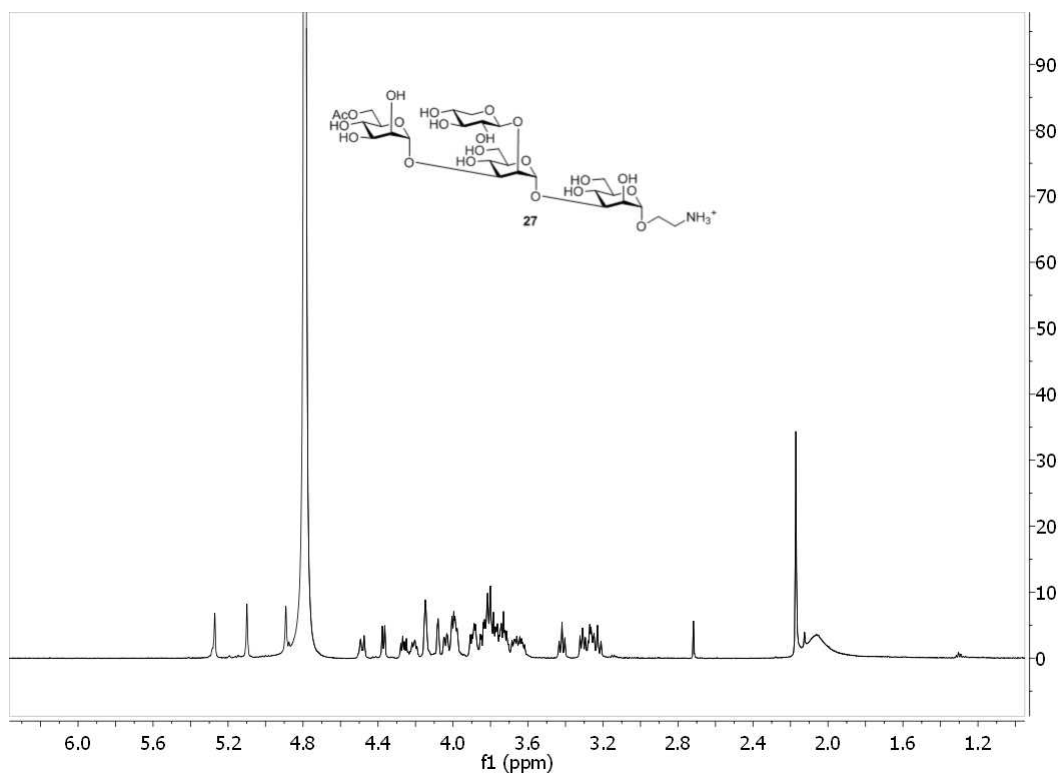

27:  $^1\text{H}$   $^{13}\text{C}$  HSQC ( $\text{D}_2\text{O}$ , 600 MHz)

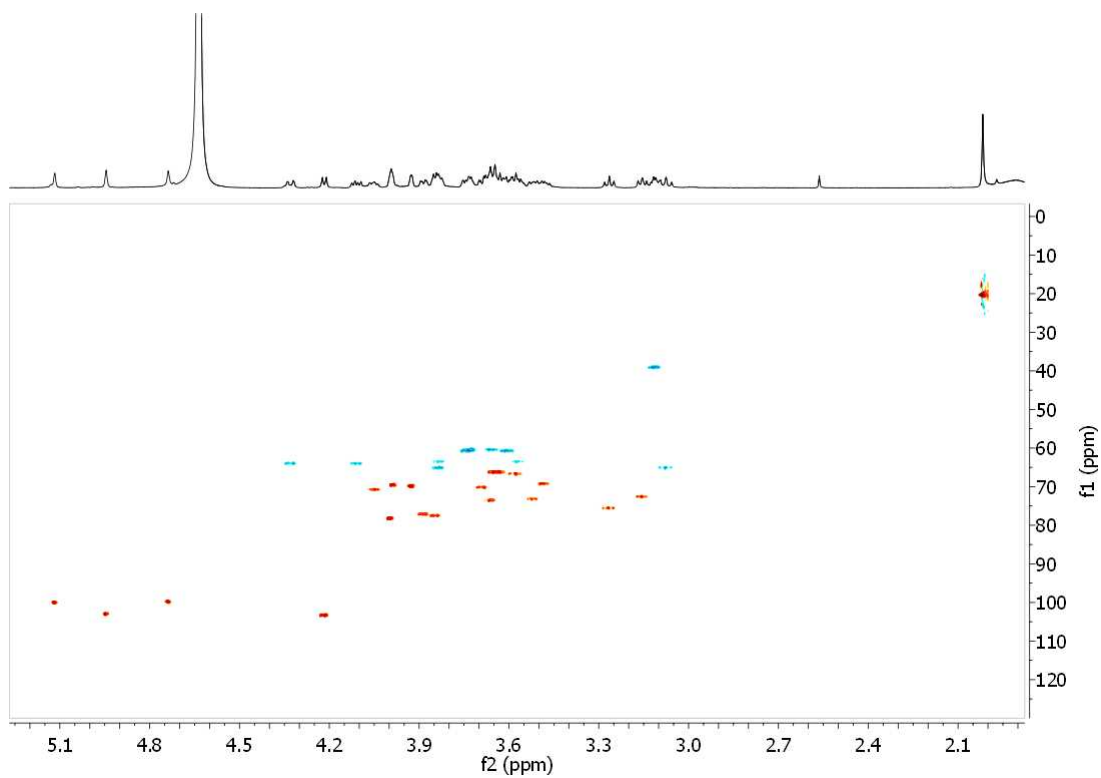



28:  $^1\text{H}$  NMR ( $\text{D}_2\text{O}$ , 600 MHz)

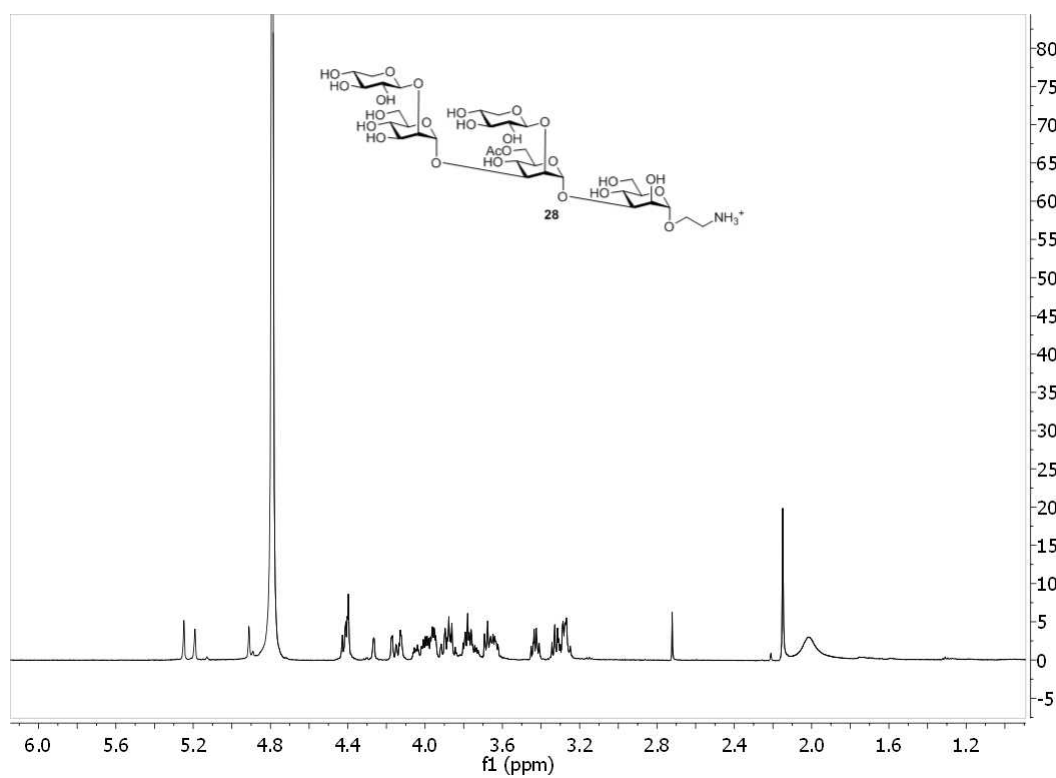

28:  $^1\text{H}$   $^{13}\text{C}$  HSQC ( $\text{D}_2\text{O}$ , 600 MHz)

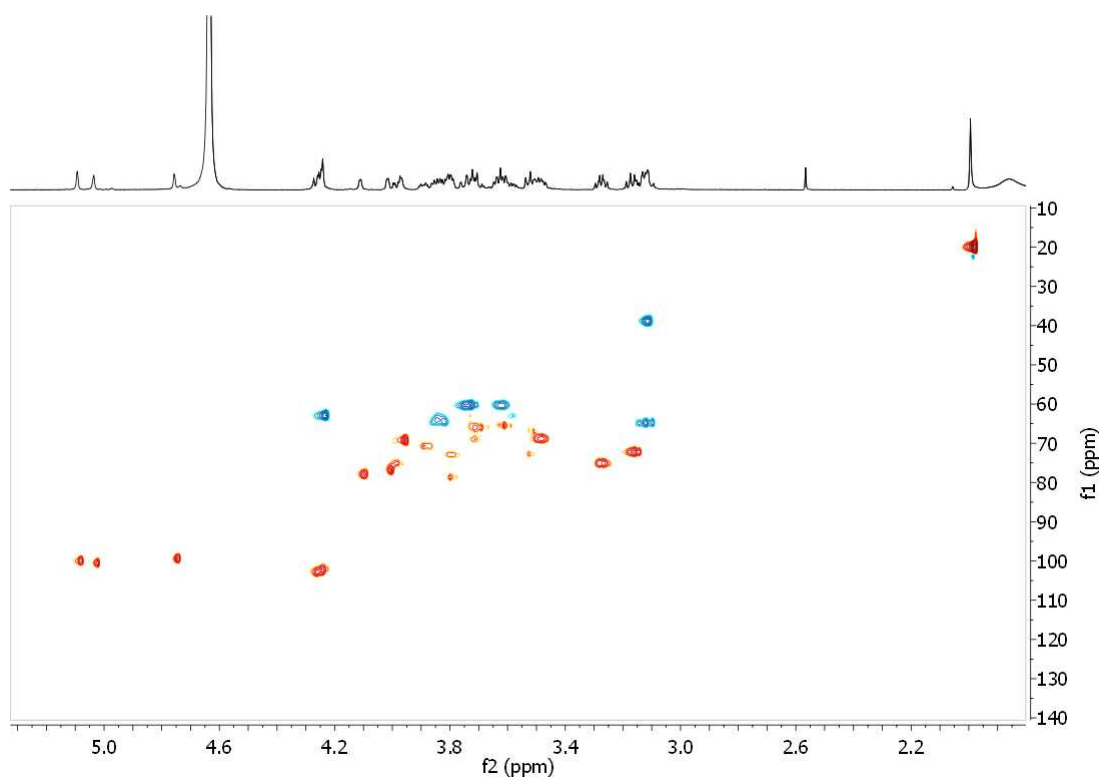

Supplement: c5ob00766f1.pdf [file c5ob00766f1.pdf]
